# Supplementary material
Source: PubMed Central journal article supplement (PMC8403652)
Supplement: NIHMS1712104-supplement-1.pdf [file NIHMS1712104-supplement-1.pdf]

## Supplementary Material

### Early-life associations between per- and polyfluoroalkyl substances and serum lipids in a longitudinal birth cohort

Annelise J. Blomberg,<sup>1\*</sup> Yu-Hsuan Shih,<sup>1</sup> Carmen Messerlian,<sup>1,2</sup> Louise Helskov Jørgensen,<sup>3</sup> Pál Weihe,<sup>4,5</sup> Philippe Grandjean<sup>1,6</sup>

1. Department of Environmental Health, Harvard T. H. Chan School of Public Health, Boston Massachusetts
2. Department of Epidemiology, Harvard T.H. Chan School of Public Health, Boston Massachusetts
3. Department of Clinical Biochemistry and Pharmacology, Odense University Hospital and Institute of Clinical Research, University of Southern Denmark, Odense Denmark
4. Department of Occupational Medicine and Public Health, Faroese Hospital System, Torshavn The Faroe Islands
5. Center of Health Science, University of the Faroe Islands, Torshavn The Faroe Islands
6. Department of Environmental Medicine, University of Southern Denmark, Odense Denmark

|                                                                                                                                                                                                     |    |
|-----------------------------------------------------------------------------------------------------------------------------------------------------------------------------------------------------|----|
| Supplemental Tables.....                                                                                                                                                                            | 3  |
| Table S1: Count of missing baseline covariates in the study population (n = 490).....                                                                                                               | 3  |
| Table S2: Characteristics of the Faroese mother-child pairs at birth (n = 459), 18 months (n = 334) and nine years (n = 366). .....                                                                 | 4  |
| Table S3: Differences in PFAS distribution (ng/ml) by study characteristics.....                                                                                                                    | 5  |
| Table S4: Lipid concentrations (mmol/L) at birth, 18 months, and nine years, displayed as median [IQR]. .....                                                                                       | 7  |
| Table S5: Estimated change in serum lipid concentrations (mmol/L) per a doubling in serum PFAS concentrations.....                                                                                  | 8  |
| Supplemental Figures.....                                                                                                                                                                           | 13 |
| Figure S1: Study selection flow diagram.....                                                                                                                                                        | 13 |
| Figure S2: Directed acyclic graph of the hypothesized causal pathway between child PFAS, measured at birth in cord serum, and child lipid levels measured at birth, 18 months, and nine years. .... | 14 |
| Figure S3: Directed acyclic graph of the hypothesized causal pathway between child PFAS at nine years and lipids at nine years. ....                                                                | 15 |
| Figure S4: Distribution of PFASs for participants with and without missing covariate information.....                                                                                               | 16 |
| Figure S5: Distribution of lipids for participants with and without missing covariate information.....                                                                                              | 17 |
| Figure S6: Baseline covariate distribution for the study population (n = 475) and participants who miss follow-up at 18 months (n = 141), 5 years (n = 184) and 9 years (n = 109). ....             | 18 |

|                                                                                                                                                                                                                                                                                                                                                                                              |    |
|----------------------------------------------------------------------------------------------------------------------------------------------------------------------------------------------------------------------------------------------------------------------------------------------------------------------------------------------------------------------------------------------|----|
| Figure S7: Cord blood PFAS concentrations in the study population (n = 475) and participants who miss follow-up at 18 months (n = 141), 5 years (n = 184) and 9 years (n = 109). .....                                                                                                                                                                                                       | 19 |
| Figure S8: Distribution of serum PFAS concentrations by visit and sex. ....                                                                                                                                                                                                                                                                                                                  | 20 |
| Figure S9: Correlations of PFAS within and across visits.....                                                                                                                                                                                                                                                                                                                                | 21 |
| Figure S10: Associations between PFAS exposures and lipids, presented as the estimated change in serum lipid concentrations for a doubling in serum PFAS concentrations. All models were adjusted for child sex and maternal education. Models for PFAS at birth, 18 months and 5 years were further adjusted for smoking, education, parity, and pre-pregnancy BMI. ....                    | 22 |
| Figure S11: Associations between PFASs and lipids by sex, calculated from a model that includes an interaction term between PFAS and sex. ....                                                                                                                                                                                                                                               | 23 |
| Figure S12: GEE model results for associations between PFAS exposures and lipid outcomes at nine years, compared to primary model results. Results are presented as the estimated difference in serum lipid concentrations for a doubling in serum PFAS concentrations. GEE models were adjusted for child sex, maternal education, smoking, education, parity and pre-pregnancy BMI. ....   | 24 |
| Figure S13: GEE model results for sex-specific associations between PFAS exposures and lipid outcomes at nine years, compared to primary model results. Results are presented as the estimated difference in serum lipid concentrations for a doubling in serum PFAS concentrations. GEE models were adjusted for maternal education, smoking, education, parity and pre-pregnancy BMI. .... | 25 |
| Figure S14: Estimated change in serum lipid concentrations for a doubling in serum PFAS concentrations, with and without additional adjustment for PFAS sources (maternal whale consumption during pregnancy, breastfeed duration and childhood whale consumption).....                                                                                                                      | 26 |
| Figure S15: Estimated difference in serum lipid concentrations for a doubling in serum PFAS concentrations, with and without inclusion of stabilized inverse probability weights (IPW) to account for potential loss to follow-up. ....                                                                                                                                                      | 27 |
| Figure S16: Estimated change in serum lipid concentrations for a doubling in serum PFAS concentrations, estimated using complete cases and our imputed datasets. ....                                                                                                                                                                                                                        | 28 |
| Figure S17: Estimated thin-plate splines for significant nonlinear PFAS terms. ....                                                                                                                                                                                                                                                                                                          | 29 |

## Supplemental Tables

Table S1: Count of missing baseline covariates in the study population (n = 490).

| <b>Characteristic</b> | <b>N (%)</b> |
|-----------------------|--------------|
| Child sex             | 0 (0)        |
| Maternal education    | 13 (2.7)     |
| Maternal smoking      | 2 (0.41)     |
| Parity                | 2 (0.41)     |
| Maternal BMI          | 1 (0.20)     |

Table S2: Characteristics of the Faroese mother-child pairs at birth (n = 459), 18 months (n = 334) and nine years (n = 366).

| <b>Visit</b>               | <b>Characteristic</b>        | <b>Overall</b>       | <b>Female</b>        | <b>Male</b>       | <b>p-value*</b> |
|----------------------------|------------------------------|----------------------|----------------------|-------------------|-----------------|
| Birth                      | Sex                          |                      | 219                  | 240               |                 |
|                            | Female                       | 219 (47.7)           |                      |                   |                 |
|                            | Male                         | 240 (52.3)           |                      |                   |                 |
|                            | Maternal education           |                      |                      |                   |                 |
|                            | Low                          | 151 (32.9)           | 81 (37.0)            | 70 (29.2)         | 0.141           |
|                            | Medium                       | 119 (25.9)           | 57 (26.0)            | 62 (25.8)         |                 |
|                            | High                         | 189 (41.2)           | 81 (37.0)            | 108 (45.0)        |                 |
|                            | Maternal smoking             |                      |                      |                   |                 |
|                            | Yes                          | 70 (15.3)            | 35 (16.0)            | 35 (14.6)         | 0.775           |
|                            | No                           | 389 (84.7)           | 184 (84.0)           | 205 (85.4)        |                 |
|                            | Parity                       |                      |                      |                   |                 |
| Primiparous                | 135 (29.4)                   | 75 (34.2)            | 60 (25.0)            | 0.039             |                 |
| Multiparous                | 324 (70.6)                   | 144 (65.8)           | 180 (75.0)           |                   |                 |
| Maternal BMI               | 23.66 [21.23, 25.93]         | 23.15 [21.00, 25.79] | 24.03 [21.54, 26.38] | 0.064             |                 |
| Maternal whale consumption |                              |                      |                      |                   |                 |
| Yes                        | 89 (19.7)                    | 35 (16.3)            | 54 (22.9)            | 0.101             |                 |
| No                         | 362 (80.3)                   | 180 (83.7)           | 182 (77.1)           |                   |                 |
| 18 months                  | Breastfeed duration (months) | 5.00 [4.00, 6.00]    | 5.00 [4.00, 6.00]    | 5.00 [4.00, 6.00] | 0.341           |
| Nine years                 | Child whale consumption      |                      |                      |                   |                 |
|                            | Yes                          | 154 (42.3)           | 64 (36.6)            | 90 (47.6)         | 0.043           |
|                            | No                           | 210 (57.7)           | 111 (63.4)           | 99 (52.4)         |                 |

\* p-values are for chi-square tests with continuity correction (categorical) or Wilcoxon rank-sum tests (non-normal continuous) tests when comparing population characteristics between males and females.

Table S3: Differences in PFAS distribution (ng/ml) by study characteristics.

| Visit                      | Characteristics    | N (%)             | Median [IQR]      |                   |                   |                   |                   |
|----------------------------|--------------------|-------------------|-------------------|-------------------|-------------------|-------------------|-------------------|
|                            |                    |                   | PFOA              | PFHxS             | PFNA              | PFOS              | PFDA              |
| Birth                      | Overall            | 459               | 0.9 [0.63, 1.34]  | 0.17 [0.13, 0.22] | 0.32 [0.25, 0.42] | 2.87 [2.13, 4.04] | 0.09 [0.07, 0.12] |
|                            | Sex                |                   |                   |                   |                   |                   |                   |
|                            | Female             | 219 (47.7)        | 0.93 [0.65, 1.42] | 0.16 [0.12, 0.22] | 0.32 [0.25, 0.43] | 2.82 [2.04, 3.86] | 0.09 [0.07, 0.12] |
|                            | Male               | 240 (52.3)        | 0.87 [0.61, 1.22] | 0.17 [0.13, 0.22] | 0.31 [0.25, 0.41] | 2.93 [2.19, 4.10] | 0.09 [0.07, 0.12] |
|                            | p-value*           |                   | 0.213             | 0.286             | 0.81              | 0.194             | 0.091             |
|                            | Maternal education |                   |                   |                   |                   |                   |                   |
|                            | Low                | 151 (32.9)        | 0.97 [0.67, 1.43] | 0.16 [0.12, 0.21] | 0.30 [0.24, 0.41] | 2.89 [2.15, 4.06] | 0.08 [0.07, 0.11] |
|                            | Medium             | 119 (25.9)        | 0.96 [0.67, 1.36] | 0.17 [0.13, 0.21] | 0.34 [0.27, 0.43] | 2.98 [2.24, 4.05] | 0.10 [0.07, 0.12] |
|                            | High               | 189 (41.2)        | 0.84 [0.57, 1.18] | 0.17 [0.13, 0.23] | 0.32 [0.25, 0.42] | 2.76 [2.01, 4.03] | 0.09 [0.07, 0.12] |
|                            | p-value            |                   | 0.025             | 0.317             | 0.17              | 0.208             | 0.031             |
|                            | Maternal smoking   |                   |                   |                   |                   |                   |                   |
|                            | Yes                | 70 (15.3)         | 1.00 [0.77, 1.44] | 0.20 [0.15, 0.25] | 0.32 [0.27, 0.45] | 3.28 [2.45, 4.22] | 0.10 [0.08, 0.13] |
|                            | No                 | 389 (84.7)        | 0.86 [0.61, 1.29] | 0.16 [0.12, 0.22] | 0.31 [0.25, 0.41] | 2.83 [2.10, 3.94] | 0.09 [0.07, 0.12] |
|                            | p-value            |                   | 0.007             | 0.008             | 0.161             | 0.057             | 0.06              |
|                            | Parity             |                   |                   |                   |                   |                   |                   |
|                            | Primiparous        | 135 (29.4)        | 1.34 [0.96, 1.88] | 0.18 [0.15, 0.27] | 0.33 [0.27, 0.45] | 3.25 [2.41, 4.43] | 0.09 [0.07, 0.12] |
|                            | Multiparous        | 324 (70.6)        | 0.76 [0.57, 1.08] | 0.16 [0.12, 0.21] | 0.31 [0.24, 0.40] | 2.76 [2.02, 3.84] | 0.09 [0.07, 0.12] |
|                            | p-value            |                   | <0.001            | <0.001            | 0.008             | <0.001            | 0.627             |
|                            | Maternal BMI       |                   |                   |                   |                   |                   |                   |
|                            | Underweight        | 10 (2.2)          | 0.99 [0.52, 1.37] | 0.16 [0.12, 0.28] | 0.34 [0.26, 0.41] | 2.16 [1.76, 2.55] | 0.10 [0.08, 0.12] |
|                            | Normal             | 292 (63.6)        | 0.87 [0.59, 1.24] | 0.16 [0.12, 0.22] | 0.30 [0.23, 0.39] | 2.71 [2.01, 3.85] | 0.09 [0.07, 0.12] |
|                            | Overweight         | 111 (24.2)        | 0.94 [0.72, 1.35] | 0.18 [0.13, 0.22] | 0.34 [0.27, 0.42] | 3.26 [2.41, 4.29] | 0.10 [0.07, 0.12] |
|                            | Obese              | 46 (10.0)         | 0.91 [0.68, 1.38] | 0.18 [0.14, 0.24] | 0.35 [0.27, 0.53] | 3.32 [2.49, 4.39] | 0.09 [0.07, 0.13] |
| p-value                    |                    | 0.373             | 0.592             | 0.046             | 0.001             | 0.487             |                   |
| Maternal whale consumption |                    |                   |                   |                   |                   |                   |                   |
| Yes                        | 89 (19.7)          | 0.91 [0.63, 1.22] | 0.17 [0.12, 0.22] | 0.34 [0.26, 0.48] | 3.18 [2.16, 4.56] | 0.10 [0.08, 0.14] |                   |
| No                         | 362 (80.3)         | 0.89 [0.63, 1.33] | 0.17 [0.13, 0.22] | 0.31 [0.25, 0.41] | 2.84 [2.13, 3.89] | 0.09 [0.07, 0.12] |                   |
| p-value                    |                    | 0.677             | 0.709             | 0.068             | 0.105             | 0.009             |                   |

| Visit      | Characteristics     | N (%)      | Median [IQR]      |                   |                   |                    |                   |
|------------|---------------------|------------|-------------------|-------------------|-------------------|--------------------|-------------------|
|            |                     |            | PFOA              | PFHxS             | PFNA              | PFOS               | PFDA              |
| 18 months  | Overall             | 334        | 2.74 [1.98, 4.45] | 0.23 [0.09, 0.41] | 0.96 [0.64, 1.46] | 6.81 [4.38, 9.82]  | 0.28 [0.21, 0.41] |
|            | Breastfeed Duration |            |                   |                   |                   |                    |                   |
|            | <5                  | 126 (37.8) | 2.05 [1.33, 2.95] | 0.11 [0.01, 0.23] | 0.69 [0.44, 0.98] | 4.79 [3.23, 6.77]  | 0.23 [0.18, 0.29] |
|            | 5                   | 69 (20.7)  | 2.88 [2.26, 4.25] | 0.26 [0.15, 0.43] | 1.07 [0.83, 1.49] | 7.05 [5.70, 9.51]  | 0.30 [0.23, 0.42] |
|            | 6                   | 119 (35.7) | 3.84 [2.62, 5.35] | 0.34 [0.20, 0.52] | 1.26 [0.92, 1.74] | 8.50 [6.69, 11.47] | 0.35 [0.24, 0.48] |
|            | >6                  | 19 (5.7)   | 3.20 [1.87, 4.29] | 0.27 [0.14, 0.37] | 0.95 [0.57, 1.67] | 7.65 [3.84, 10.29] | 0.27 [0.18, 0.41] |
|            | p-value             |            | <0.001            | <0.001            | <0.001            | <0.001             | <0.001            |
| Nine years | Overall             | 366        | 1.43 [1.19, 1.74] | 0.26 [0.2, 0.34]  | 0.63 [0.49, 0.86] | 3.08 [2.42, 4.31]  | 0.23 [0.17, 0.31] |
|            | Whale Consumption   |            |                   |                   |                   |                    |                   |
|            | Yes                 | 154 (42.3) | 1.38 [1.18, 1.65] | 0.30 [0.23, 0.38] | 0.76 [0.58, 1.00] | 3.87 [2.78, 5.25]  | 0.28 [0.22, 0.38] |
|            | No                  | 210 (57.7) | 1.47 [1.22, 1.79] | 0.24 [0.19, 0.30] | 0.58 [0.48, 0.74] | 2.73 [2.20, 3.63]  | 0.20 [0.16, 0.26] |
|            | p-value             |            | 0.128             | <0.001            | <0.001            | <0.001             | <0.001            |

\* p-values are for Wilcoxon rank-sum tests (non-normal continuous) comparing PFAS distributions between population subgroups.

Table S4: Lipid concentrations (mmol/L) at birth, 18 months, and nine years, displayed as median [IQR].

| Visit     | Lipid | Overall           | Female            | Male              | p-Value* |
|-----------|-------|-------------------|-------------------|-------------------|----------|
| Birth     | HDL-C | 0.71 [0.59, 0.89] | 0.73 [0.62, 0.89] | 0.70 [0.57, 0.87] | 0.065    |
|           | LDL-C | 0.62 [0.48, 0.81] | 0.67 [0.51, 0.87] | 0.58 [0.46, 0.74] | <0.001   |
|           | TG    | 0.43 [0.33, 0.56] | 0.42 [0.32, 0.58] | 0.43 [0.33, 0.55] | 0.902    |
|           | TC    | 1.68 [1.37, 2.00] | 1.76 [1.43, 2.11] | 1.58 [1.36, 1.90] | 0.002    |
| 18 months | HDL-C | 0.72 [0.54, 0.86] | 0.68 [0.56, 0.85] | 0.74 [0.54, 0.86] | 0.462    |
|           | LDL-C | 1.89 [1.46, 2.36] | 2.01 [1.52, 2.51] | 1.80 [1.39, 2.14] | 0.002    |
|           | TG    | 1.09 [0.79, 1.50] | 1.16 [0.79, 1.59] | 1.01 [0.80, 1.35] | 0.065    |
|           | TC    | 3.48 [2.92, 4.11] | 3.68 [3.04, 4.19] | 3.33 [2.81, 3.94] | 0.004    |
| 9 years   | HDL-C | 1.45 [1.26, 1.65] | 1.44 [1.21, 1.59] | 1.51 [1.29, 1.70] | 0.027    |
|           | LDL-C | 2.24 [1.93, 2.65] | 2.34 [2.00, 2.74] | 2.16 [1.83, 2.57] | 0.001    |
|           | TG    | 0.88 [0.65, 1.27] | 0.91 [0.71, 1.27] | 0.82 [0.61, 1.26] | 0.019    |
|           | TC    | 4.24 [3.82, 4.70] | 4.29 [3.93, 4.82] | 4.22 [3.67, 4.63] | 0.048    |

\* p-values are for Wilcoxon rank-sum tests (non-normal continuous) comparing lipid distributions between males and females.

Table S5: Estimated change in serum lipid concentrations (mmol/L) per a doubling in serum PFAS concentrations.

| Outcome                                         | Exposure | Effect Estimate (95% CI) |                         |                         | p-interaction |
|-------------------------------------------------|----------|--------------------------|-------------------------|-------------------------|---------------|
|                                                 |          | Overall <sup>†</sup>     | Females <sup>‡</sup>    | Males <sup>‡</sup>      |               |
| PFAS at birth and lipids at birth (n = 459)     |          |                          |                         |                         |               |
| TC                                              | PFOA     | -0.013 (-0.077, 0.051)   | 0.00037 (-0.086, 0.087) | -0.026 (-0.11, 0.061)   | 0.66          |
|                                                 | PFHxS    | 0.027 (-0.038, 0.092)    | 0.053 (-0.034, 0.14)    | -0.0034 (-0.098, 0.091) | 0.383         |
|                                                 | PFNA     | -0.0077 (-0.082, 0.067)  | 0.053 (-0.048, 0.15)    | -0.076 (-0.18, 0.032)   | 0.0862        |
|                                                 | PFOS     | -0.0083 (-0.073, 0.056)  | 0.016 (-0.074, 0.11)    | -0.032 (-0.12, 0.057)   | 0.451         |
|                                                 | PFDA     | -0.034 (-0.11, 0.045)    | 0.048 (-0.069, 0.16)    | -0.1 (-0.21, 0.0043)    | 0.0628        |
| HDL-C                                           | PFOA     | 0.0058 (-0.024, 0.036)   | 0.0026 (-0.037, 0.042)  | 0.0091 (-0.031, 0.05)   | 0.812         |
|                                                 | PFHxS    | -0.02 (-0.05, 0.01)      | -0.012 (-0.052, 0.029)  | -0.03 (-0.074, 0.014)   | 0.539         |
|                                                 | PFNA     | -0.0073 (-0.042, 0.028)  | -0.0043 (-0.051, 0.043) | -0.011 (-0.062, 0.04)   | 0.854         |
|                                                 | PFOS     | -0.02 (-0.05, 0.01)      | -0.026 (-0.068, 0.016)  | -0.014 (-0.055, 0.028)  | 0.672         |
|                                                 | PFDA     | -0.00094 (-0.038, 0.036) | 0.0077 (-0.047, 0.062)  | -0.0084 (-0.059, 0.042) | 0.671         |
| LDL-C                                           | PFOA     | -0.0016 (-0.04, 0.037)   | -0.0016 (-0.053, 0.05)  | -0.0016 (-0.053, 0.05)  | 1             |
|                                                 | PFHxS    | 0.0066 (-0.032, 0.045)   | 0.019 (-0.033, 0.07)    | -0.0079 (-0.064, 0.048) | 0.486         |
|                                                 | PFNA     | 0.00043 (-0.044, 0.045)  | 0.035 (-0.025, 0.095)   | -0.039 (-0.1, 0.025)    | 0.0978        |
|                                                 | PFOS     | 0.0068 (-0.031, 0.045)   | 0.024 (-0.03, 0.078)    | -0.0093 (-0.062, 0.043) | 0.382         |
|                                                 | PFDA     | -0.019 (-0.066, 0.029)   | 0.024 (-0.046, 0.094)   | -0.055 (-0.12, 0.0094)  | 0.105         |
| TG                                              | PFOA     | 0.2 (-4.8, 5.5)          | 3.5 (-3.4, 11)          | -2.9 (-9.3, 3.9)        | 0.17          |
|                                                 | PFHxS    | 11 (5.9, 17)**           | 13 (5.5, 21)**          | 9.7 (1.9, 18)*          | 0.564         |
|                                                 | PFNA     | 2.8 (-3.1, 9.1)          | 5.6 (-2.6, 15)          | -0.25 (-8.4, 8.6)       | 0.338         |
|                                                 | PFOS     | 4.4 (-0.83, 9.9)         | 6.4 (-1, 14)            | 2.5 (-4.5, 10)          | 0.465         |
|                                                 | PFDA     | 2.2 (-4.1, 8.8)          | 7.3 (-2.3, 18)          | -1.9 (-9.9, 6.8)        | 0.167         |
| PFAS at birth and lipids at 18 months (n = 325) |          |                          |                         |                         |               |
| TC                                              | PFOA     | -0.094 (-0.22, 0.031)    | -0.13 (-0.3, 0.032)     | -0.051 (-0.22, 0.12)    | 0.485         |
|                                                 | PFHxS    | -0.036 (-0.18, 0.1)      | -0.026 (-0.22, 0.17)    | -0.047 (-0.24, 0.15)    | 0.881         |
|                                                 | PFNA     | -0.016 (-0.17, 0.13)     | 0.026 (-0.18, 0.23)     | -0.063 (-0.28, 0.15)    | 0.555         |
|                                                 | PFOS     | -0.017 (-0.15, 0.11)     | -0.041 (-0.21, 0.13)    | 0.012 (-0.18, 0.2)      | 0.683         |
|                                                 | PFDA     | -0.1 (-0.26, 0.059)      | -0.019 (-0.26, 0.22)    | -0.17 (-0.39, 0.045)    | 0.351         |
| HDL-C                                           | PFOA     | -0.029 (-0.061, 0.0029)  | -0.031 (-0.073, 0.012)  | -0.027 (-0.072, 0.017)  | 0.91          |
|                                                 | PFHxS    | 0.00064 (-0.036, 0.037)  | -0.023 (-0.073, 0.026)  | 0.026 (-0.024, 0.077)   | 0.16          |
|                                                 | PFNA     | -0.0061 (-0.045, 0.033)  | -0.021 (-0.074, 0.032)  | 0.01 (-0.045, 0.066)    | 0.419         |
|                                                 | PFOS     | -0.023 (-0.057, 0.011)   | -0.029 (-0.074, 0.016)  | -0.016 (-0.065, 0.034)  | 0.688         |
|                                                 | PFDA     | -0.0078 (-0.049, 0.034)  | -0.0072 (-0.069, 0.054) | -0.0083 (-0.064, 0.048) | 0.98          |



| Outcome                                       | Exposure | Effect Estimate (95% CI) |                        |                       |               |
|-----------------------------------------------|----------|--------------------------|------------------------|-----------------------|---------------|
|                                               |          | Overall <sup>†</sup>     | Females <sup>‡</sup>   | Males <sup>‡</sup>    | p-interaction |
| LDL-C                                         | PFOA     | -0.074 (-0.17, 0.024)    | -0.1 (-0.23, 0.027)    | -0.043 (-0.18, 0.092) | 0.515         |
|                                               | PFHxS    | -0.045 (-0.15, 0.064)    | -0.054 (-0.2, 0.095)   | -0.036 (-0.19, 0.12)  | 0.872         |
|                                               | PFNA     | -0.011 (-0.13, 0.11)     | 0.04 (-0.12, 0.2)      | -0.066 (-0.23, 0.1)   | 0.368         |
|                                               | PFOS     | -0.031 (-0.13, 0.07)     | -0.05 (-0.19, 0.086)   | -0.0092 (-0.16, 0.14) | 0.692         |
|                                               | PFDA     | -0.094 (-0.22, 0.032)    | -0.031 (-0.22, 0.15)   | -0.15 (-0.32, 0.022)  | 0.364         |
| TG                                            | PFOA     | 0.72 (-5.7, 7.6)         | -5.5 (-13, 3.1)        | 7.8 (-1.5, 18)        | 0.0318        |
|                                               | PFHxS    | 3.5 (-3.9, 11)           | 7.9 (-2.5, 19)         | -0.87 (-11, 9.9)      | 0.244         |
|                                               | PFNA     | -2 (-9.5, 6.2)           | -5.9 (-16, 5.1)        | 2.3 (-8.6, 14)        | 0.296         |
|                                               | PFOS     | 3.8 (-3.2, 11)           | 1.2 (-7.8, 11)         | 6.9 (-3.3, 18)        | 0.424         |
|                                               | PFDA     | 0.33 (-7.9, 9.3)         | -2.8 (-15, 11)         | 2.8 (-8.2, 15)        | 0.518         |
| PFAS at birth and lipids at 9 years (n = 356) |          |                          |                        |                       |               |
| TC                                            | PFOA     | 0.027 (-0.086, 0.14)     | -0.073 (-0.22, 0.077)  | 0.12 (-0.024, 0.27)   | 0.0523        |
|                                               | PFHxS    | -0.022 (-0.14, 0.095)    | -0.053 (-0.21, 0.1)    | 0.016 (-0.15, 0.19)   | 0.554         |
|                                               | PFNA     | 0.048 (-0.083, 0.18)     | -0.06 (-0.24, 0.12)    | 0.17 (-0.018, 0.36)   | 0.0799        |
|                                               | PFOS     | -0.0084 (-0.12, 0.1)     | -0.077 (-0.23, 0.079)  | 0.059 (-0.096, 0.21)  | 0.221         |
|                                               | PFDA     | 0.024 (-0.12, 0.17)      | -0.12 (-0.33, 0.083)   | 0.15 (-0.042, 0.34)   | 0.0578        |
| HDL-C                                         | PFOA     | 0.0055 (-0.038, 0.049)   | -0.012 (-0.071, 0.047) | 0.022 (-0.036, 0.08)  | 0.399         |
|                                               | PFHxS    | 0.021 (-0.024, 0.066)    | 0.0028 (-0.057, 0.063) | 0.044 (-0.022, 0.11)  | 0.362         |
|                                               | PFNA     | 0.023 (-0.028, 0.074)    | -0.011 (-0.08, 0.057)  | 0.062 (-0.011, 0.13)  | 0.15          |
|                                               | PFOS     | 0.027 (-0.016, 0.071)    | -0.004 (-0.064, 0.056) | 0.058 (-0.0014, 0.12) | 0.145         |
|                                               | PFDA     | 0.053 (-0.0017, 0.11)    | 0.0064 (-0.074, 0.086) | 0.092 (0.018, 0.17)*  | 0.123         |
| LDL-C                                         | PFOA     | -0.011 (-0.098, 0.076)   | -0.051 (-0.17, 0.066)  | 0.027 (-0.088, 0.14)  | 0.326         |
|                                               | PFHxS    | -0.055 (-0.14, 0.034)    | -0.057 (-0.18, 0.062)  | -0.052 (-0.18, 0.078) | 0.96          |
|                                               | PFNA     | 0.025 (-0.075, 0.13)     | 0.018 (-0.12, 0.15)    | 0.034 (-0.11, 0.18)   | 0.875         |
|                                               | PFOS     | -0.047 (-0.13, 0.039)    | -0.045 (-0.17, 0.075)  | -0.05 (-0.17, 0.069)  | 0.958         |
|                                               | PFDA     | -0.019 (-0.13, 0.09)     | -0.046 (-0.21, 0.11)   | 0.0037 (-0.14, 0.15)  | 0.652         |
| TG                                            | PFOA     | -1.2 (-7.6, 5.6)         | -4.5 (-13, 4.4)        | 2 (-6.6, 11)          | 0.275         |
|                                               | PFHxS    | -1.8 (-8.3, 5.2)         | 2.6 (-6.3, 12)         | -6.8 (-16, 3)         | 0.156         |
|                                               | PFNA     | -0.079 (-7.5, 7.9)       | -3.8 (-13, 6.8)        | 4.3 (-6.7, 17)        | 0.297         |
|                                               | PFOS     | -2 (-8.3, 4.7)           | -3 (-12, 6.3)          | -1 (-9.6, 8.4)        | 0.757         |
|                                               | PFDA     | 2.3 (-5.9, 11)           | -1.4 (-13, 11)         | 5.5 (-5.7, 18)        | 0.424         |

| Outcome                                             | Exposure | Effect Estimate (95% CI) |                        |                          |               |
|-----------------------------------------------------|----------|--------------------------|------------------------|--------------------------|---------------|
|                                                     |          | Overall <sup>†</sup>     | Females <sup>‡</sup>   | Males <sup>‡</sup>       | p-interaction |
| PFAS at 18 months and lipids at 18 months (n = 334) |          |                          |                        |                          |               |
| TC                                                  | PFOA     | 0.0021 (-0.1, 0.11)      | 0.028 (-0.12, 0.18)    | -0.025 (-0.18, 0.13)     | 0.616         |
|                                                     | PFHxS    | 0.012 (-0.041, 0.065)    | 0.024 (-0.051, 0.098)  | 0.00057 (-0.072, 0.074)  | 0.66          |
|                                                     | PFNA     | 0.061 (-0.046, 0.17)     | 0.1 (-0.041, 0.24)     | 0.011 (-0.14, 0.17)      | 0.395         |
|                                                     | PFOS     | 0.051 (-0.06, 0.16)      | 0.078 (-0.082, 0.24)   | 0.027 (-0.13, 0.18)      | 0.654         |
|                                                     | PFDA     | 0.086 (-0.046, 0.22)     | 0.14 (-0.041, 0.32)    | 0.025 (-0.17, 0.22)      | 0.391         |
| HDL-C                                               | PFOA     | -0.0027 (-0.03, 0.024)   | 0.0022 (-0.035, 0.04)  | -0.0077 (-0.046, 0.03)   | 0.716         |
|                                                     | PFHxS    | 0.0081 (-0.0052, 0.022)  | 0.0049 (-0.014, 0.024) | 0.011 (-0.0072, 0.03)    | 0.635         |
|                                                     | PFNA     | 0.027 (-0.00041, 0.054)  | 0.027 (-0.0097, 0.063) | 0.026 (-0.013, 0.066)    | 0.994         |
|                                                     | PFOS     | 0.0054 (-0.023, 0.034)   | 0.0026 (-0.038, 0.043) | 0.008 (-0.031, 0.047)    | 0.85          |
|                                                     | PFDA     | 0.042 (0.0087, 0.076)*   | 0.058 (0.012, 0.1)*    | 0.025 (-0.023, 0.073)    | 0.323         |
| LDL-C                                               | PFOA     | 0.0031 (-0.08, 0.086)    | 0.029 (-0.086, 0.14)   | -0.024 (-0.14, 0.094)    | 0.528         |
|                                                     | PFHxS    | 0.0024 (-0.039, 0.044)   | 0.0079 (-0.05, 0.066)  | -0.003 (-0.06, 0.054)    | 0.79          |
|                                                     | PFNA     | 0.047 (-0.036, 0.13)     | 0.092 (-0.019, 0.2)    | -0.0065 (-0.13, 0.11)    | 0.235         |
|                                                     | PFOS     | 0.028 (-0.06, 0.11)      | 0.05 (-0.075, 0.17)    | 0.0074 (-0.11, 0.13)     | 0.629         |
|                                                     | PFDA     | 0.071 (-0.032, 0.17)     | 0.12 (-0.024, 0.26)    | 0.02 (-0.13, 0.17)       | 0.35          |
| TG                                                  | PFOA     | 1 (-4.4, 6.8)            | 0.24 (-7.2, 8.3)       | 1.8 (-5.7, 10)           | 0.774         |
|                                                     | PFHxS    | 1.3 (-1.4, 4.1)          | 2.7 (-1.2, 6.8)        | 0.052 (-3.6, 3.9)        | 0.332         |
|                                                     | PFNA     | 1.2 (-4.2, 7)            | 1.1 (-6.2, 8.9)        | 1.4 (-6.4, 9.8)          | 0.954         |
|                                                     | PFOS     | 4.5 (-1.4, 11)           | 7.4 (-1.3, 17)         | 2 (-5.6, 10)             | 0.376         |
|                                                     | PFDA     | 0.35 (-6.3, 7.5)         | 1.8 (-7.4, 12)         | -1.2 (-10, 9)            | 0.673         |
| PFAS at 18 months and lipids at 9 years (n = 276)   |          |                          |                        |                          |               |
| TC                                                  | PFOA     | 0.023 (-0.087, 0.13)     | 0.0099 (-0.14, 0.16)   | 0.036 (-0.12, 0.19)      | 0.812         |
|                                                     | PFHxS    | -0.047 (-0.1, 0.0059)    | -0.032 (-0.11, 0.042)  | -0.062 (-0.14, 0.013)    | 0.581         |
|                                                     | PFNA     | -0.009 (-0.12, 0.1)      | 0.016 (-0.13, 0.16)    | -0.04 (-0.2, 0.12)       | 0.615         |
|                                                     | PFOS     | -0.041 (-0.15, 0.071)    | -0.019 (-0.18, 0.14)   | -0.061 (-0.21, 0.093)    | 0.713         |
|                                                     | PFDA     | -0.02 (-0.16, 0.12)      | -0.029 (-0.22, 0.16)   | -0.01 (-0.21, 0.19)      | 0.894         |
| HDL-C                                               | PFOA     | 0.012 (-0.028, 0.053)    | 0.024 (-0.032, 0.081)  | -0.00019 (-0.057, 0.057) | 0.546         |
|                                                     | PFHxS    | 0.01 (-0.0091, 0.03)     | 0.025 (-0.0023, 0.052) | -0.0042 (-0.032, 0.023)  | 0.14          |
|                                                     | PFNA     | 0.025 (-0.015, 0.066)    | 0.027 (-0.027, 0.08)   | 0.024 (-0.036, 0.084)    | 0.944         |
|                                                     | PFOS     | 0.025 (-0.016, 0.066)    | 0.047 (-0.012, 0.11)   | 0.0049 (-0.051, 0.061)   | 0.313         |
|                                                     | PFDA     | 0.027 (-0.022, 0.077)    | 0.027 (-0.041, 0.095)  | 0.028 (-0.044, 0.1)      | 0.98          |

| Outcome                                         | Exposure | Effect Estimate (95% CI) |                         |                       | p-interaction |
|-------------------------------------------------|----------|--------------------------|-------------------------|-----------------------|---------------|
|                                                 |          | Overall <sup>†</sup>     | Females <sup>‡</sup>    | Males <sup>‡</sup>    |               |
| LDL-C                                           | PFOA     | 0.011 (-0.07, 0.092)     | -0.0041 (-0.12, 0.11)   | 0.026 (-0.088, 0.14)  | 0.71          |
|                                                 | PFHxS    | -0.031 (-0.07, 0.0081)   | -0.022 (-0.077, 0.033)  | -0.04 (-0.095, 0.015) | 0.651         |
|                                                 | PFNA     | 0.029 (-0.052, 0.11)     | 0.061 (-0.047, 0.17)    | -0.011 (-0.13, 0.11)  | 0.379         |
|                                                 | PFOS     | -0.025 (-0.11, 0.057)    | -0.013 (-0.13, 0.11)    | -0.036 (-0.15, 0.077) | 0.783         |
|                                                 | PFDA     | 0.031 (-0.069, 0.13)     | 0.036 (-0.1, 0.17)      | 0.026 (-0.12, 0.17)   | 0.928         |
| TG                                              | PFOA     | -0.58 (-6.7, 6)          | 0.51 (-8.1, 9.9)        | -1.7 (-10, 7.5)       | 0.73          |
|                                                 | PFHxS    | -1.8 (-4.7, 1.3)         | -1.1 (-5.2, 3.3)        | -2.5 (-6.6, 1.8)      | 0.642         |
|                                                 | PFNA     | -2.4 (-8.5, 4)           | 1.2 (-7, 10)            | -6.8 (-15, 2.5)       | 0.205         |
|                                                 | PFOS     | -3.1 (-9.2, 3.4)         | -0.35 (-9.3, 9.5)       | -5.6 (-14, 3.2)       | 0.415         |
|                                                 | PFDA     | -2.3 (-9.7, 5.7)         | 3.5 (-7, 15)            | -8.5 (-18, 2.6)       | 0.124         |
| PFAS at 5 years and lipids at 9 years (n = 291) |          |                          |                         |                       |               |
| TC                                              | PFOA     | -0.042 (-0.2, 0.12)      | 0.051 (-0.17, 0.27)     | -0.14 (-0.37, 0.088)  | 0.237         |
|                                                 | PFHxS    | 0.071 (-0.045, 0.19)     | 0.15 (-0.00093, 0.31)   | -0.034 (-0.21, 0.14)  | 0.117         |
|                                                 | PFNA     | 0.11 (0.0085, 0.21)*     | 0.22 (0.074, 0.36)*     | 0.0047 (-0.14, 0.15)  | 0.0399        |
|                                                 | PFOS     | 0.13 (-0.014, 0.27)      | 0.2 (0.016, 0.38)*      | 0.025 (-0.19, 0.24)   | 0.232         |
|                                                 | PFDA     | 0.088 (-0.0069, 0.18)    | 0.19 (0.05, 0.33)*      | 0.0014 (-0.13, 0.13)  | 0.0544        |
| HDL-C                                           | PFOA     | -0.023 (-0.091, 0.045)   | -0.02 (-0.11, 0.074)    | -0.025 (-0.12, 0.071) | 0.935         |
|                                                 | PFHxS    | 0.016 (-0.033, 0.064)    | 0.044 (-0.021, 0.11)    | -0.02 (-0.092, 0.053) | 0.205         |
|                                                 | PFNA     | 0.026 (-0.017, 0.07)     | -0.013 (-0.074, 0.048)  | 0.065 (0.0044, 0.13)* | 0.0771        |
|                                                 | PFOS     | 0.052 (-0.0073, 0.11)    | 0.043 (-0.034, 0.12)    | 0.063 (-0.027, 0.15)  | 0.738         |
|                                                 | PFDA     | 0.018 (-0.022, 0.058)    | -0.0068 (-0.066, 0.053) | 0.04 (-0.015, 0.094)  | 0.265         |
| LDL-C                                           | PFOA     | 0.088 (-0.045, 0.22)     | 0.15 (-0.029, 0.33)     | 0.018 (-0.17, 0.21)   | 0.308         |
|                                                 | PFHxS    | 0.04 (-0.055, 0.14)      | 0.097 (-0.029, 0.22)    | -0.031 (-0.17, 0.11)  | 0.188         |
|                                                 | PFNA     | 0.08 (-0.0047, 0.16)     | 0.2 (0.079, 0.31)*      | -0.037 (-0.15, 0.08)  | 0.00605       |
|                                                 | PFOS     | 0.089 (-0.026, 0.2)      | 0.18 (0.029, 0.33)*     | -0.033 (-0.21, 0.14)  | 0.0727        |
|                                                 | PFDA     | 0.073 (-0.0048, 0.15)    | 0.18 (0.067, 0.3)*      | -0.018 (-0.12, 0.086) | 0.0127        |
| TG                                              | PFOA     | -7.6 (-17, 2.7)          | 0.32 (-13, 16)          | -15 (-27, -1.7)*      | 0.107         |
|                                                 | PFHxS    | -0.98 (-8.2, 6.8)        | 0.069 (-9.6, 11)        | -2.3 (-13, 9.4)       | 0.761         |
|                                                 | PFNA     | 0.49 (-6.1, 7.6)         | 5.8 (-3.8, 16)          | -4.5 (-13, 5)         | 0.133         |
|                                                 | PFOS     | -0.089 (-8.9, 9.6)       | 0.97 (-11, 14)          | -1.5 (-15, 13)        | 0.793         |
|                                                 | PFDA     | 0.6 (-5.5, 7.1)          | 3.4 (-5.8, 13)          | -1.7 (-9.7, 7)        | 0.433         |

| Outcome                                         | Exposure | Effect Estimate (95% CI) |                       |                       | p-interaction |
|-------------------------------------------------|----------|--------------------------|-----------------------|-----------------------|---------------|
|                                                 |          | Overall <sup>†</sup>     | Females <sup>‡</sup>  | Males <sup>‡</sup>    |               |
| PFAS at 9 years and lipids at 9 years (n = 366) |          |                          |                       |                       |               |
| TC                                              | PFOA     | 0.16 (-0.041, 0.35)      | 0.18 (-0.1, 0.46)     | 0.14 (-0.14, 0.41)    | 0.832         |
|                                                 | PFHxS    | 0.056 (-0.089, 0.2)      | 0.15 (-0.051, 0.36)   | -0.04 (-0.24, 0.16)   | 0.188         |
|                                                 | PFNA     | 0.16 (0.026, 0.29)*      | 0.21 (0.01, 0.4)*     | 0.12 (-0.06, 0.3)     | 0.509         |
|                                                 | PFOS     | 0.15 (0.025, 0.27)*      | 0.25 (0.077, 0.43)*   | 0.05 (-0.12, 0.22)    | 0.104         |
|                                                 | PFDA     | 0.19 (0.066, 0.32)*      | 0.2 (0.0098, 0.39)*   | 0.19 (0.017, 0.36)*   | 0.931         |
| HDL-C                                           | PFOA     | 0.02 (-0.056, 0.097)     | 2.8e-06 (-0.11, 0.11) | 0.041 (-0.068, 0.15)  | 0.601         |
|                                                 | PFHxS    | 0.034 (-0.022, 0.089)    | 0.039 (-0.04, 0.12)   | 0.029 (-0.05, 0.11)   | 0.856         |
|                                                 | PFNA     | 0.063 (0.012, 0.11)*     | 0.018 (-0.058, 0.095) | 0.098 (0.03, 0.17)*   | 0.129         |
|                                                 | PFOS     | 0.077 (0.03, 0.12)*      | 0.07 (0.0017, 0.14)*  | 0.083 (0.018, 0.15)*  | 0.788         |
|                                                 | PFDA     | 0.1 (0.054, 0.15)**      | 0.057 (-0.016, 0.13)  | 0.14 (0.075, 0.21)**  | 0.0967        |
| LDL-C                                           | PFOA     | 0.14 (-0.0062, 0.3)      | 0.23 (0.022, 0.45)*   | 0.054 (-0.16, 0.27)   | 0.242         |
|                                                 | PFHxS    | 0.07 (-0.04, 0.18)       | 0.21 (0.054, 0.36)*   | -0.064 (-0.22, 0.088) | 0.0144        |
|                                                 | PFNA     | 0.12 (0.018, 0.22)*      | 0.23 (0.076, 0.38)*   | 0.033 (-0.1, 0.17)    | 0.0619        |
|                                                 | PFOS     | 0.093 (-0.00048, 0.19)   | 0.25 (0.11, 0.38)**   | -0.047 (-0.17, 0.08)  | 0.0019        |
|                                                 | PFDA     | 0.12 (0.023, 0.22)*      | 0.19 (0.038, 0.33)*   | 0.072 (-0.059, 0.2)   | 0.259         |
| TG                                              | PFOA     | -2.5 (-14, 9.9)          | -1.2 (-17, 17)        | -3.8 (-19, 14)        | 0.826         |
|                                                 | PFHxS    | -3.4 (-11, 5.3)          | -3.2 (-14, 9.5)       | -3.6 (-15, 8.9)       | 0.963         |
|                                                 | PFNA     | -1.4 (-9, 6.9)           | -0.38 (-12, 12)       | -2.2 (-12, 8.9)       | 0.823         |
|                                                 | PFOS     | 0.25 (-6.9, 8)           | 0.43 (-9.8, 12)       | 0.082 (-9.7, 11)      | 0.964         |
|                                                 | PFDA     | -0.16 (-7.6, 7.9)        | 2.9 (-8.4, 16)        | -2.5 (-12, 8.2)       | 0.496         |

\* p-value < 0.05; \*\* p-value < 0.001

<sup>†</sup> Overall effect estimates are calculated from the fully-adjusted primary models. Significance for each effect estimate is illustrated using asterisks.

<sup>‡</sup> Effect estimates for females and males are calculated from models that include an interaction term between sex and PFAS concentrations. Significance for each effect estimate, illustrated using asterisks, denotes whether the sex-specific estimate is significantly different from zero. The significance of the interaction term is included in the column “p-interaction.”

## Supplemental Figures

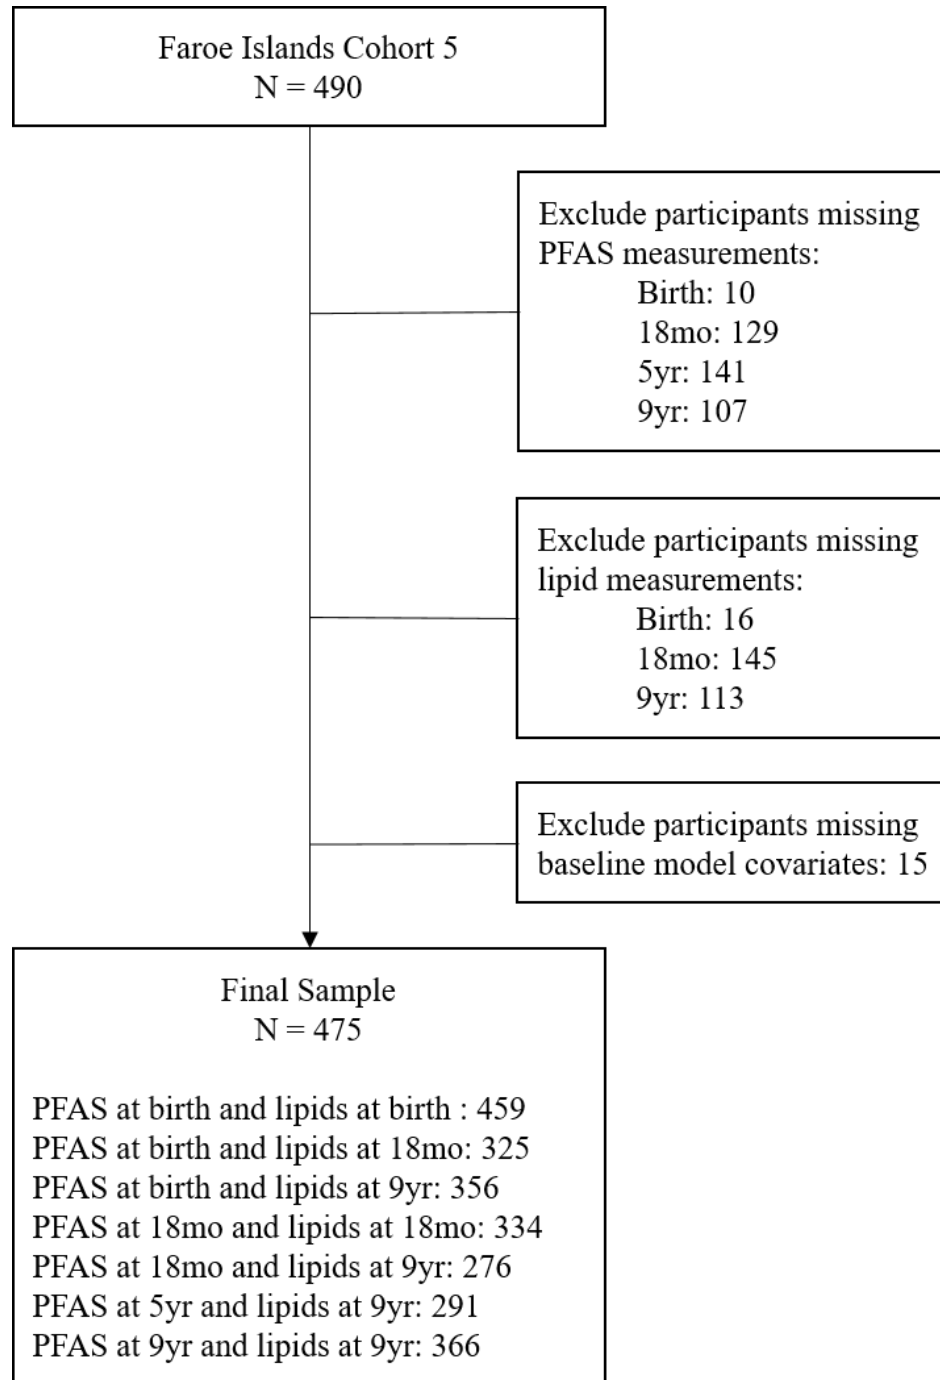

Figure S1: Study selection flow diagram.

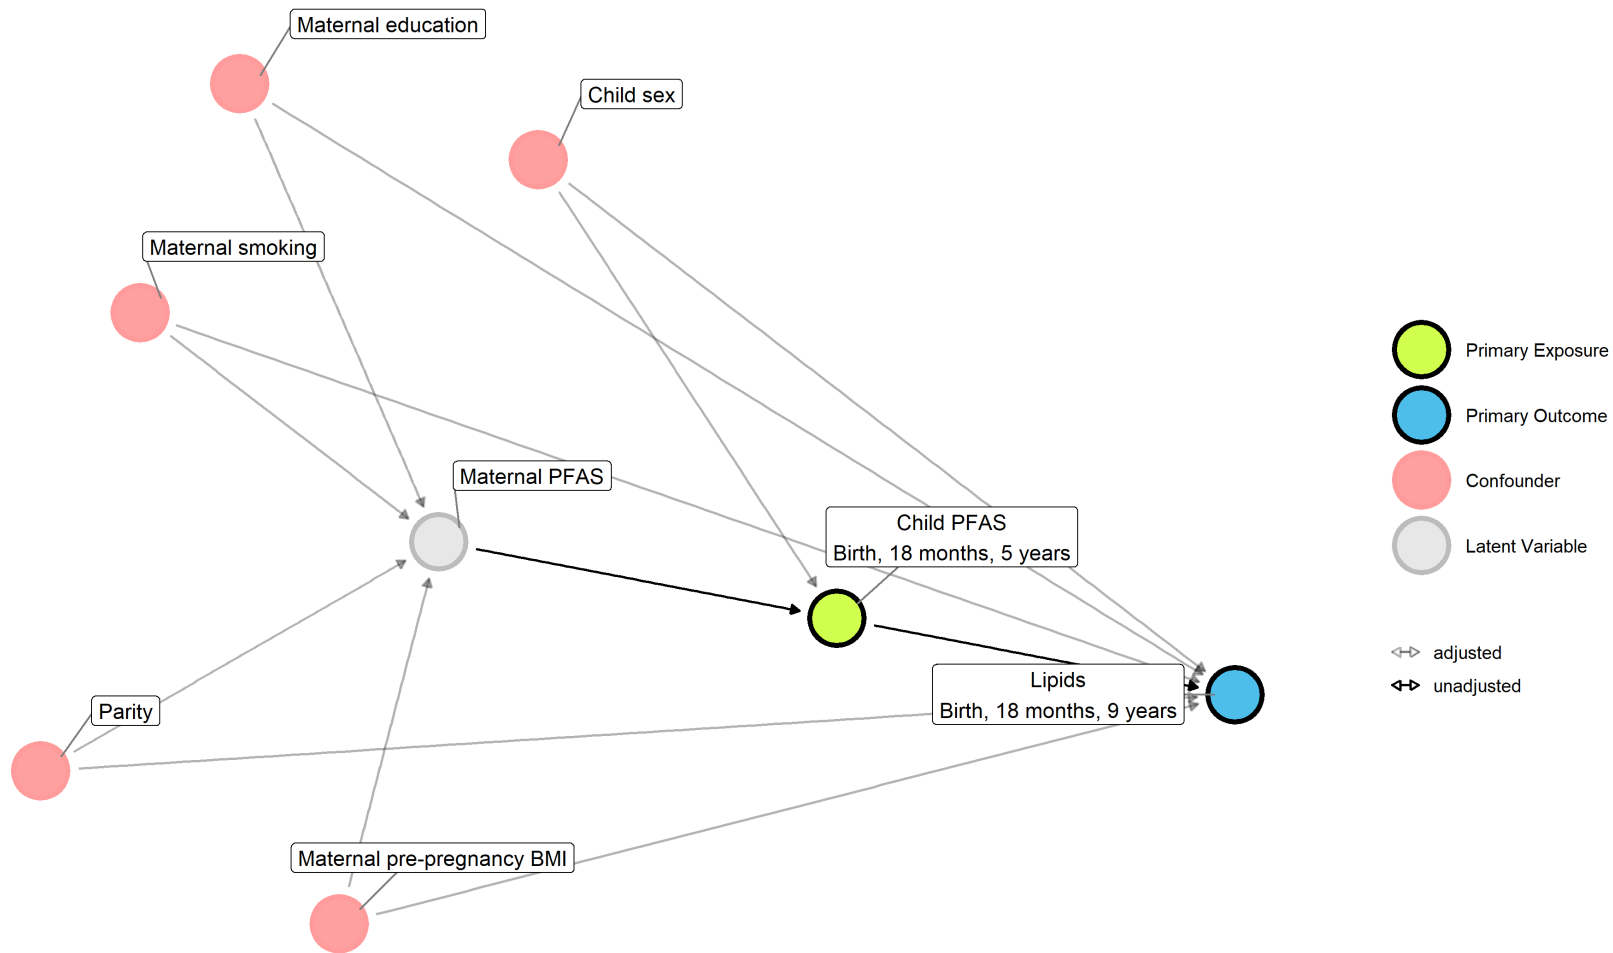

Figure S2: Directed acyclic graph of the hypothesized causal pathway between child PFAS, measured at birth in cord serum, and child lipid levels measured at birth, 18 months, and nine years.

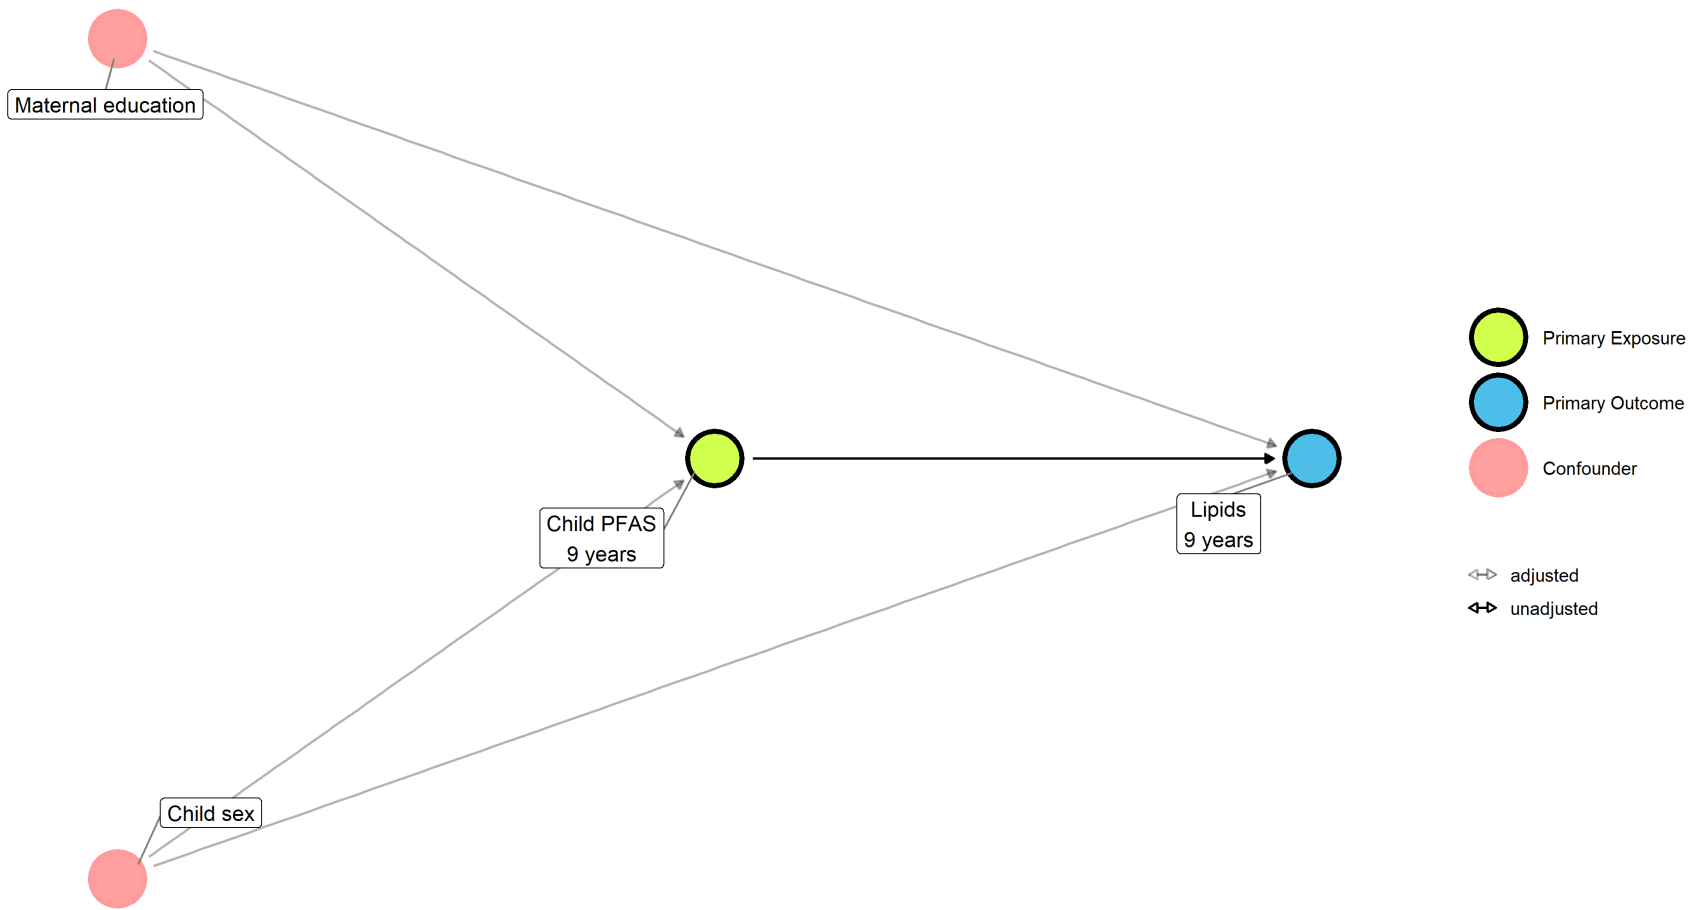

Figure S3: Directed acyclic graph of the hypothesized causal pathway between child PFAS at nine years and lipids at nine years.

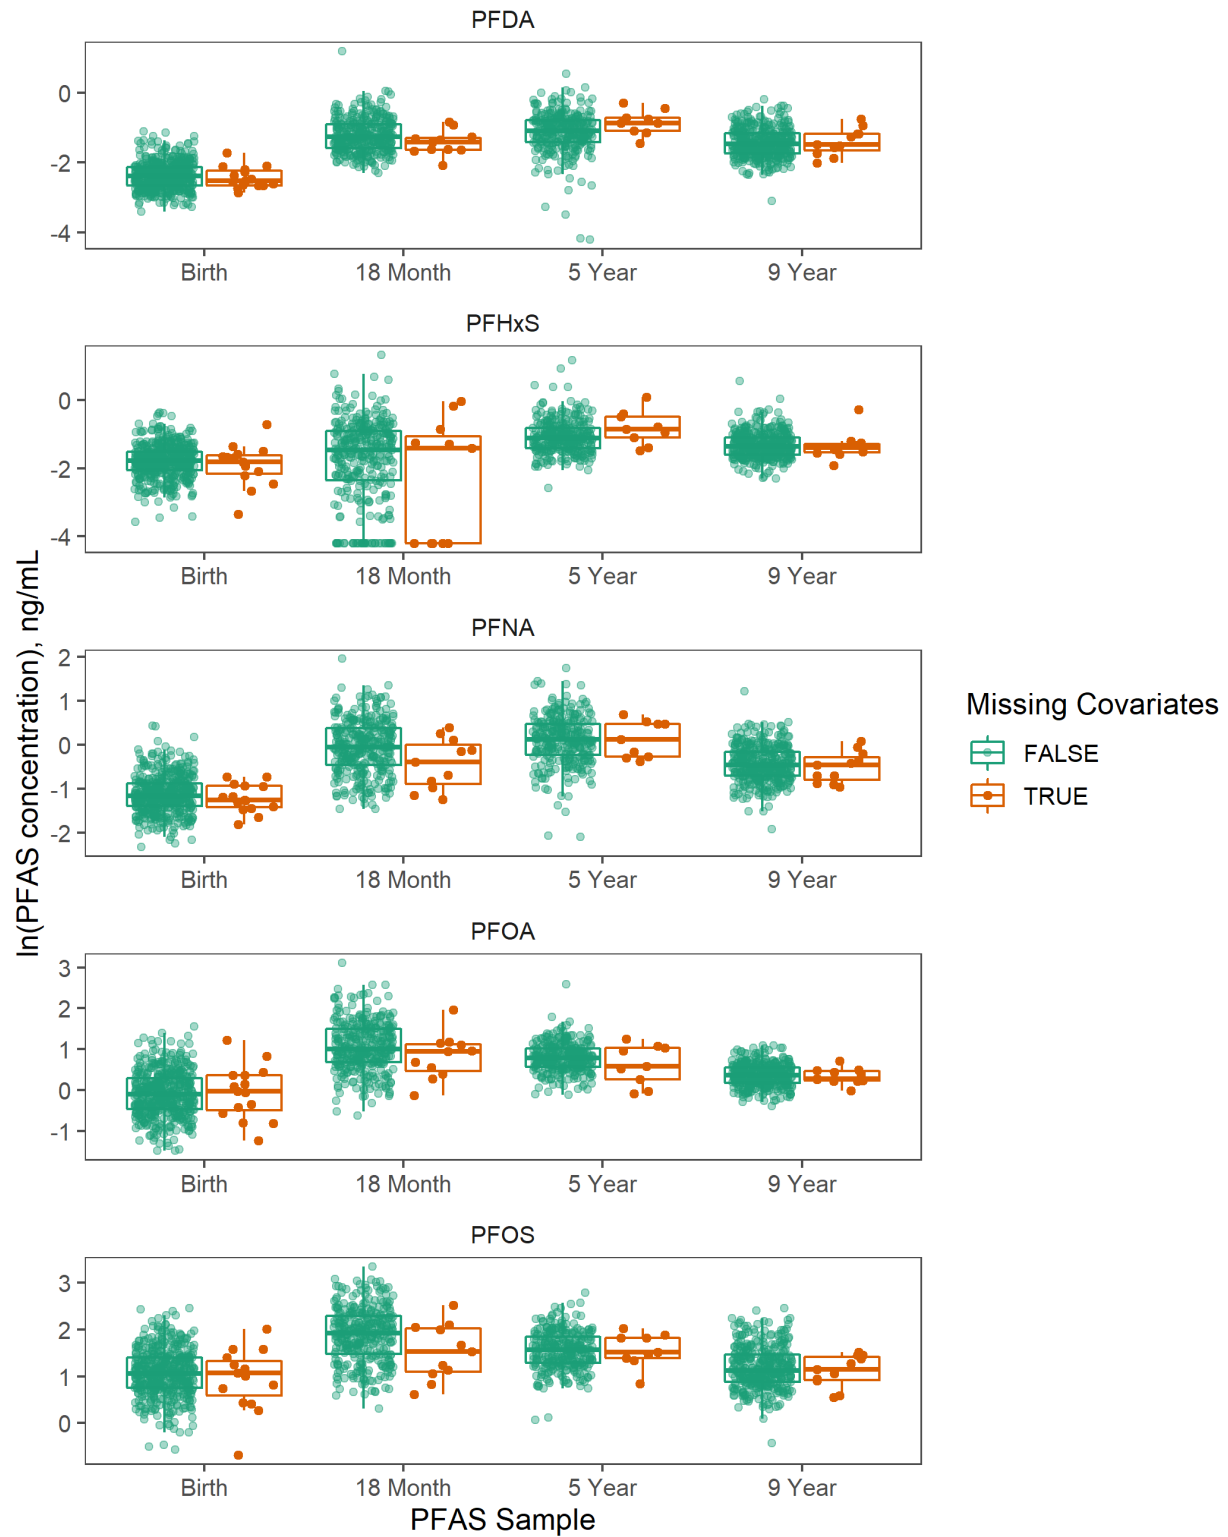

Figure S4: Distribution of PFASs for participants with and without missing covariate information.



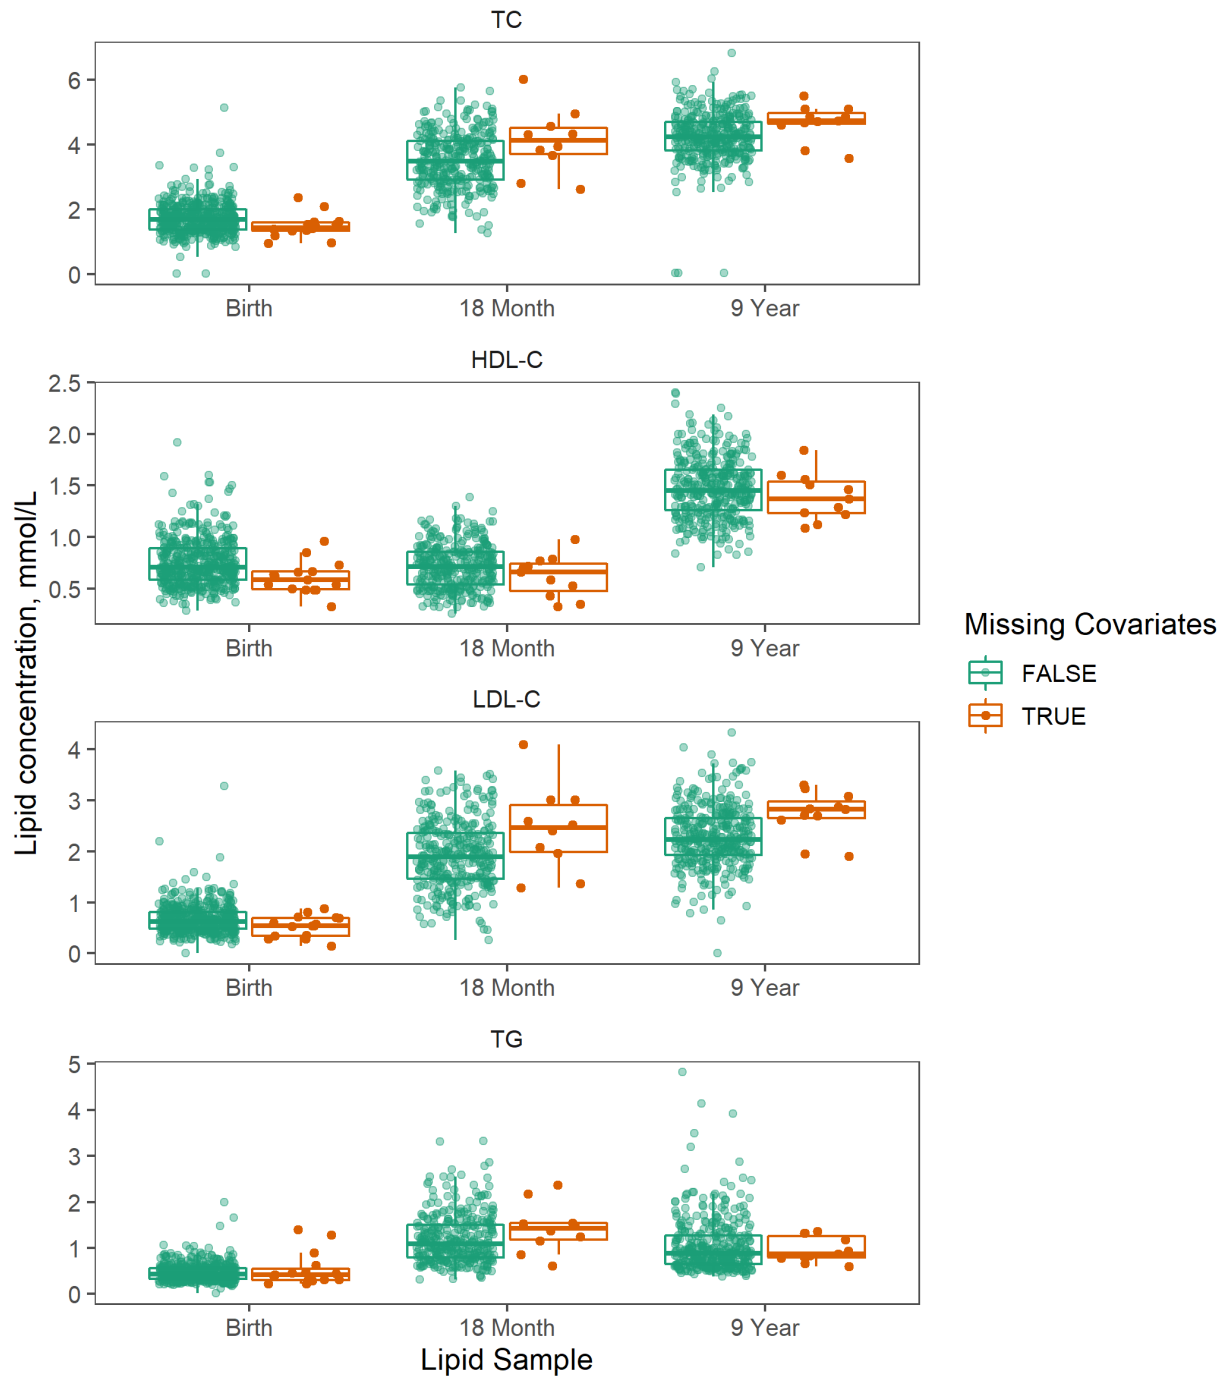

Figure S5: Distribution of lipids for participants with and without missing covariate information.

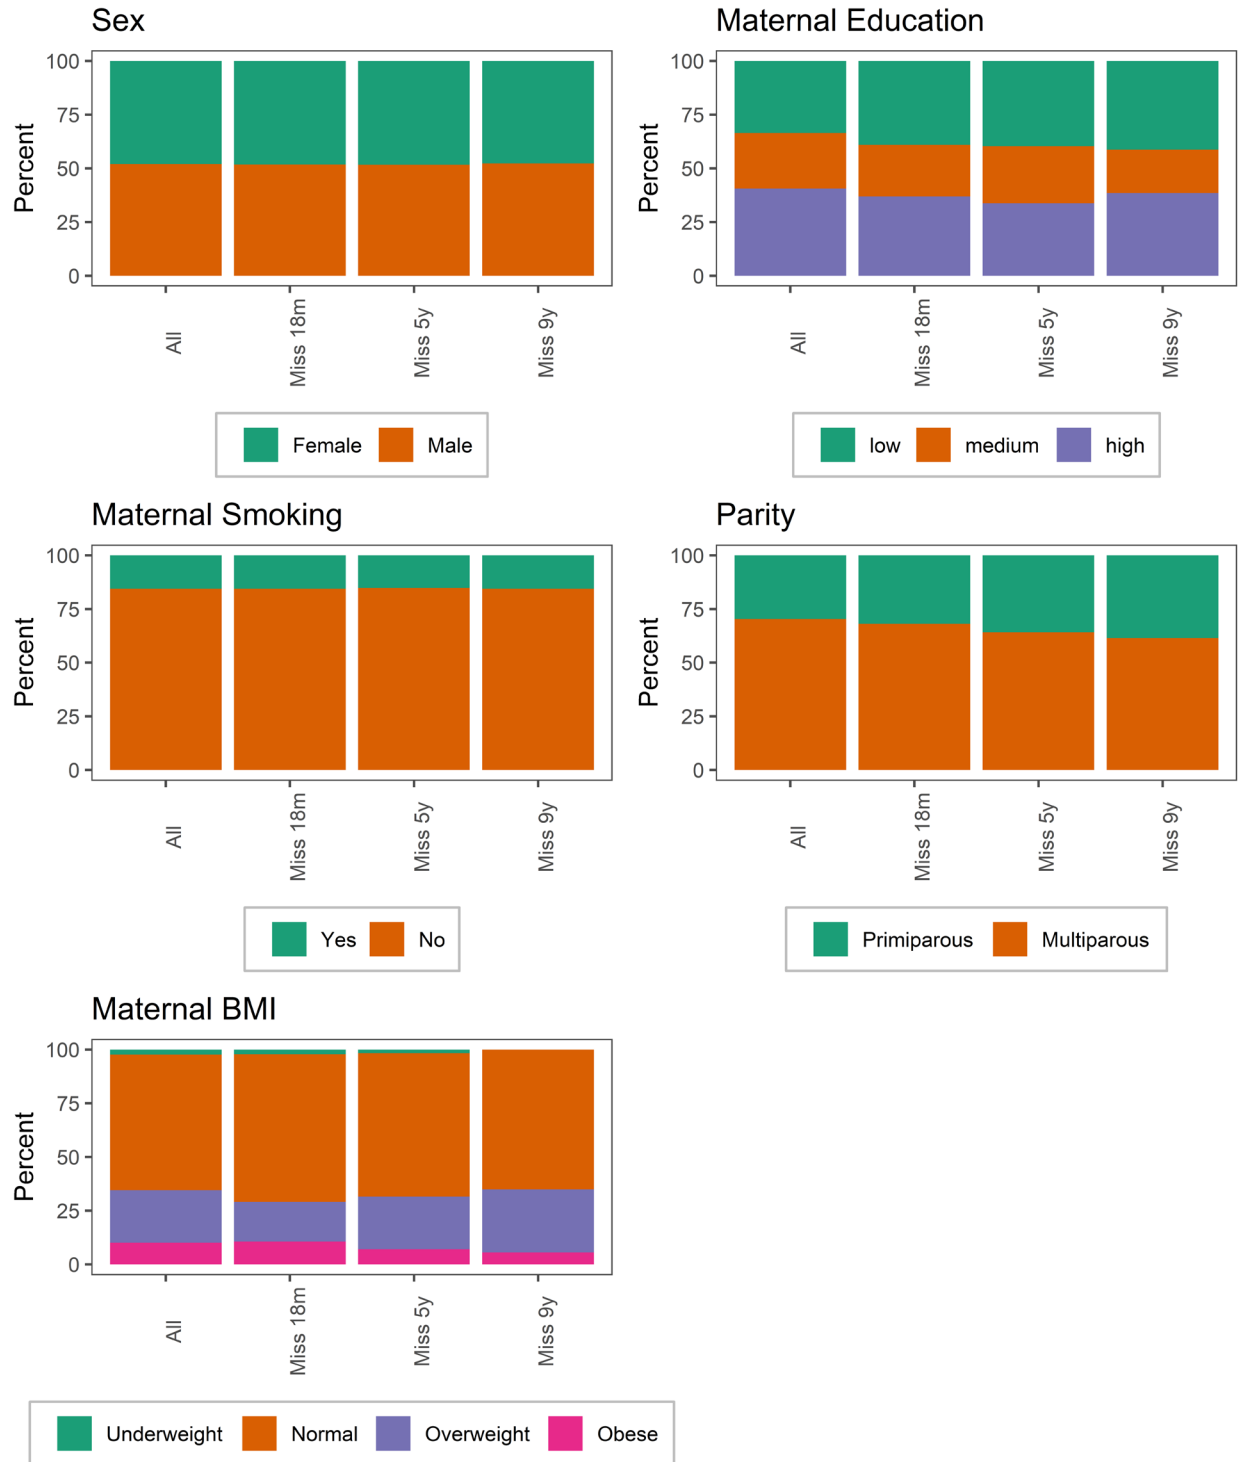

Figure S6: Baseline covariate distribution for the study population (n = 475) and participants who miss follow-up at 18 months (n = 141), 5 years (n = 184) and 9 years (n = 109).

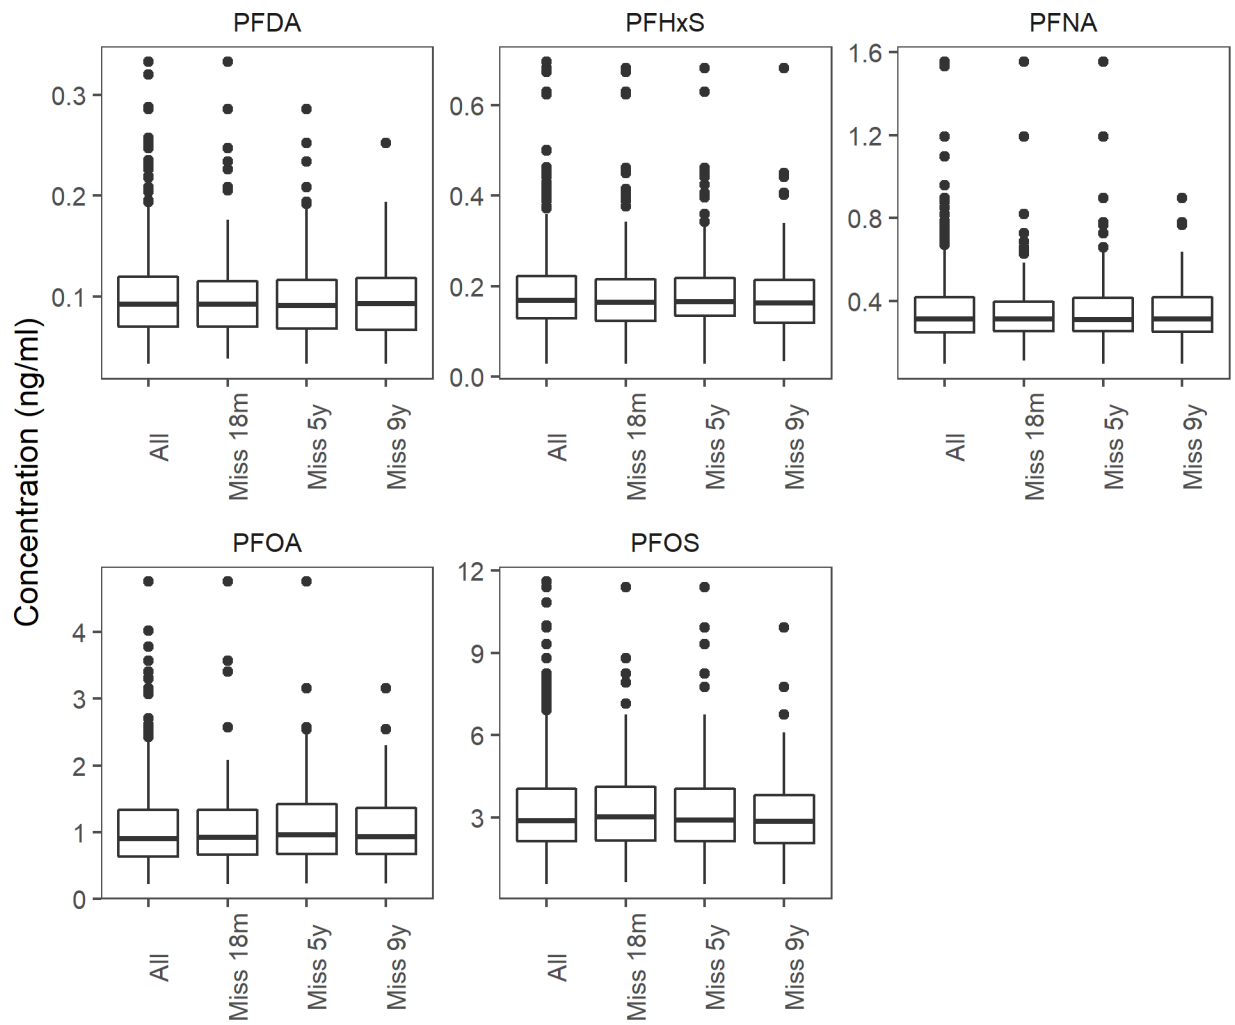

Figure S7: Cord blood PFAS concentrations in the study population (n = 475) and participants who miss follow-up at 18 months (n = 141), 5 years (n = 184) and 9 years (n = 109).

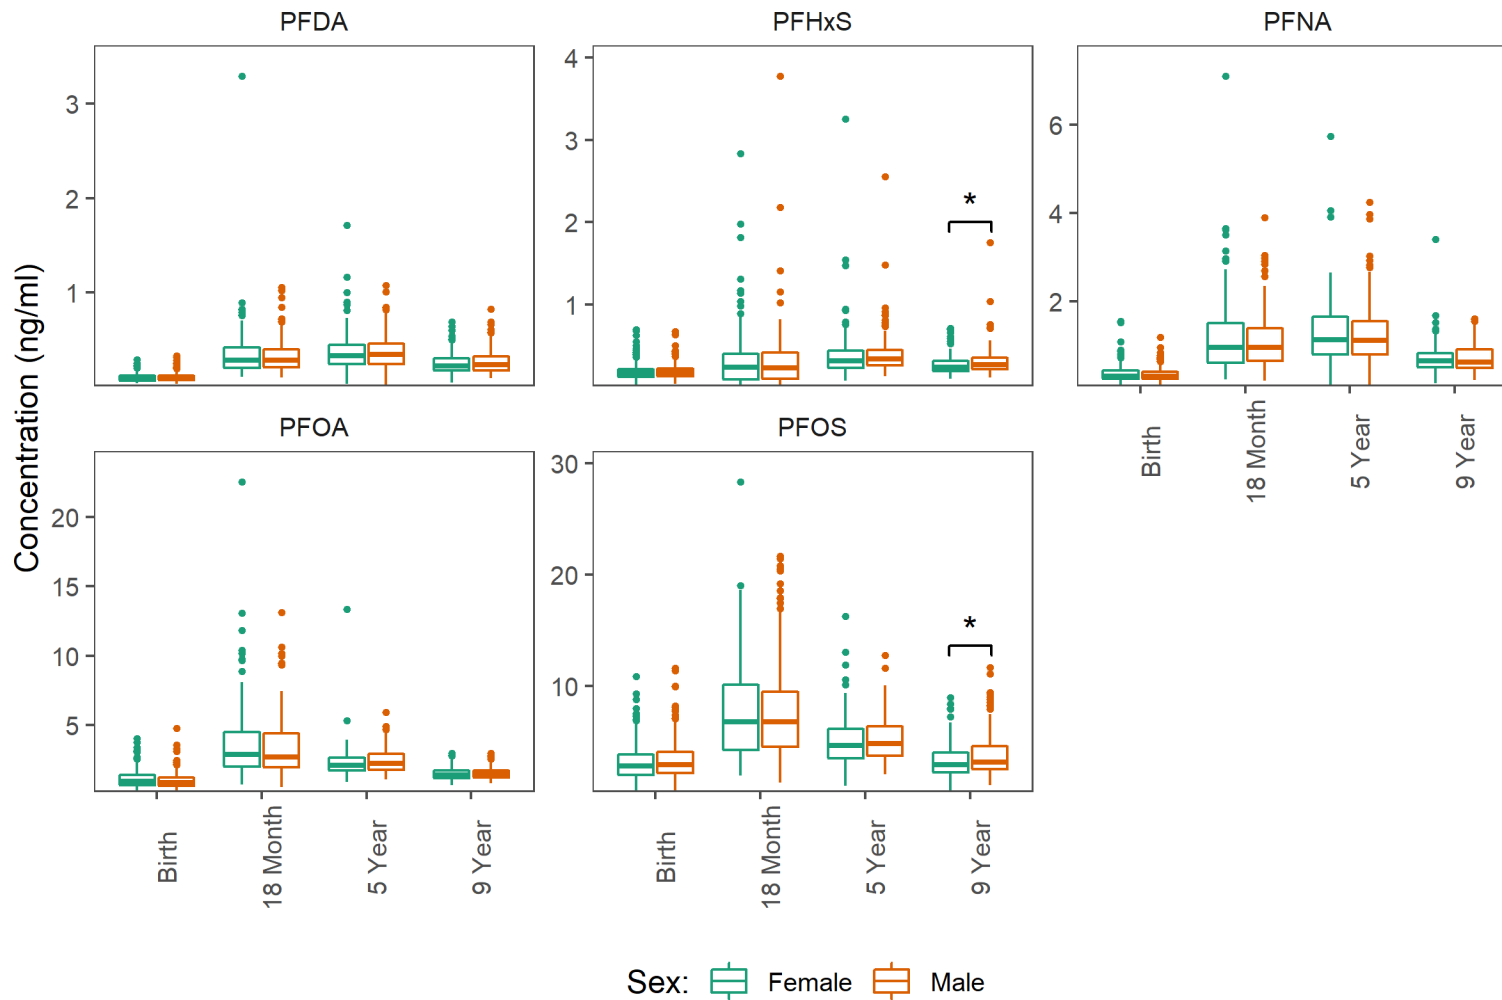

\* p-value < 0.05 from Wilcoxon rank-sum test.

Figure S8: Distribution of serum PFAS concentrations by visit and sex.

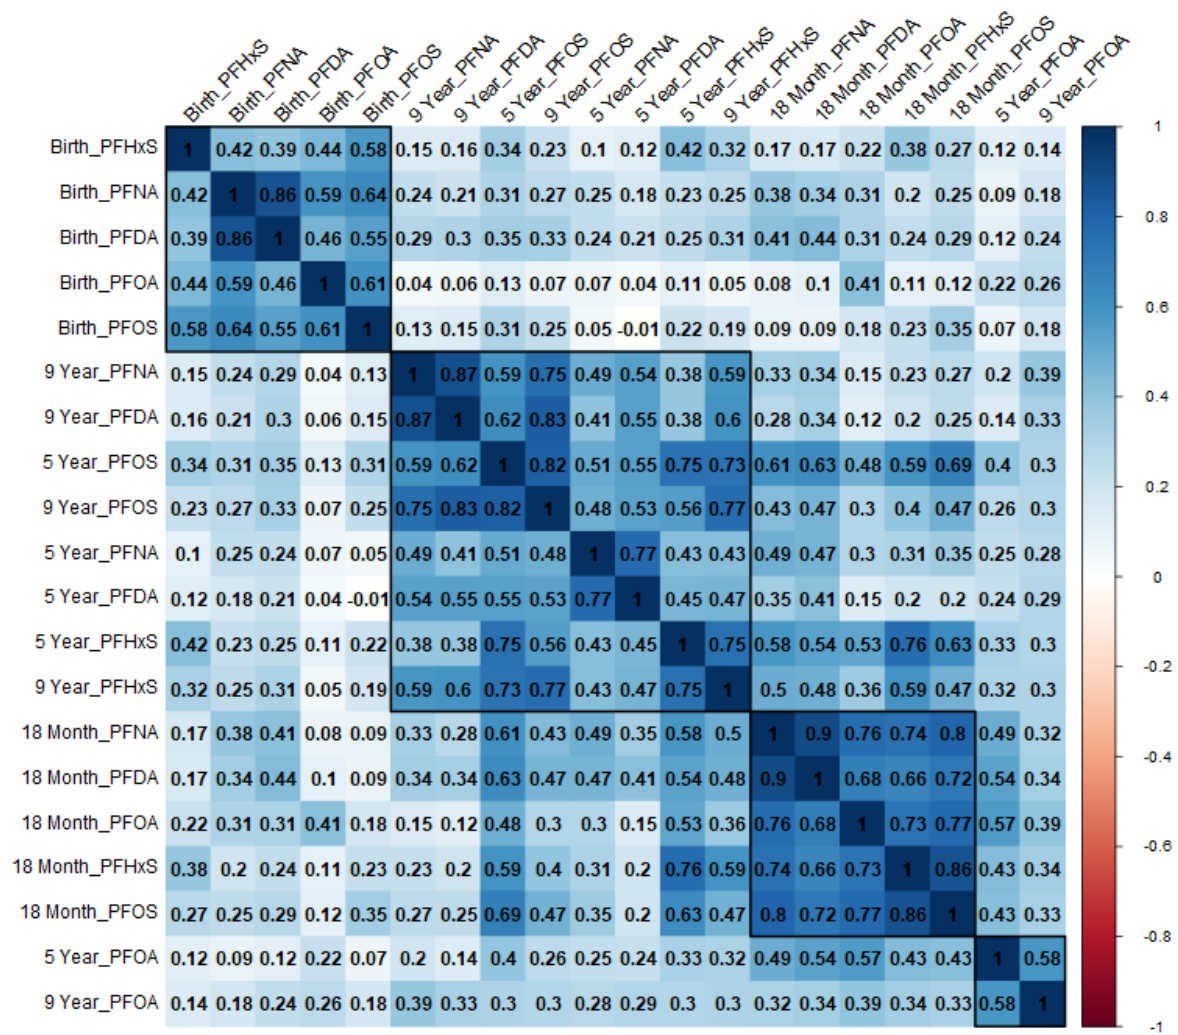

Figure S9: Correlations of PFAS within and across visits.

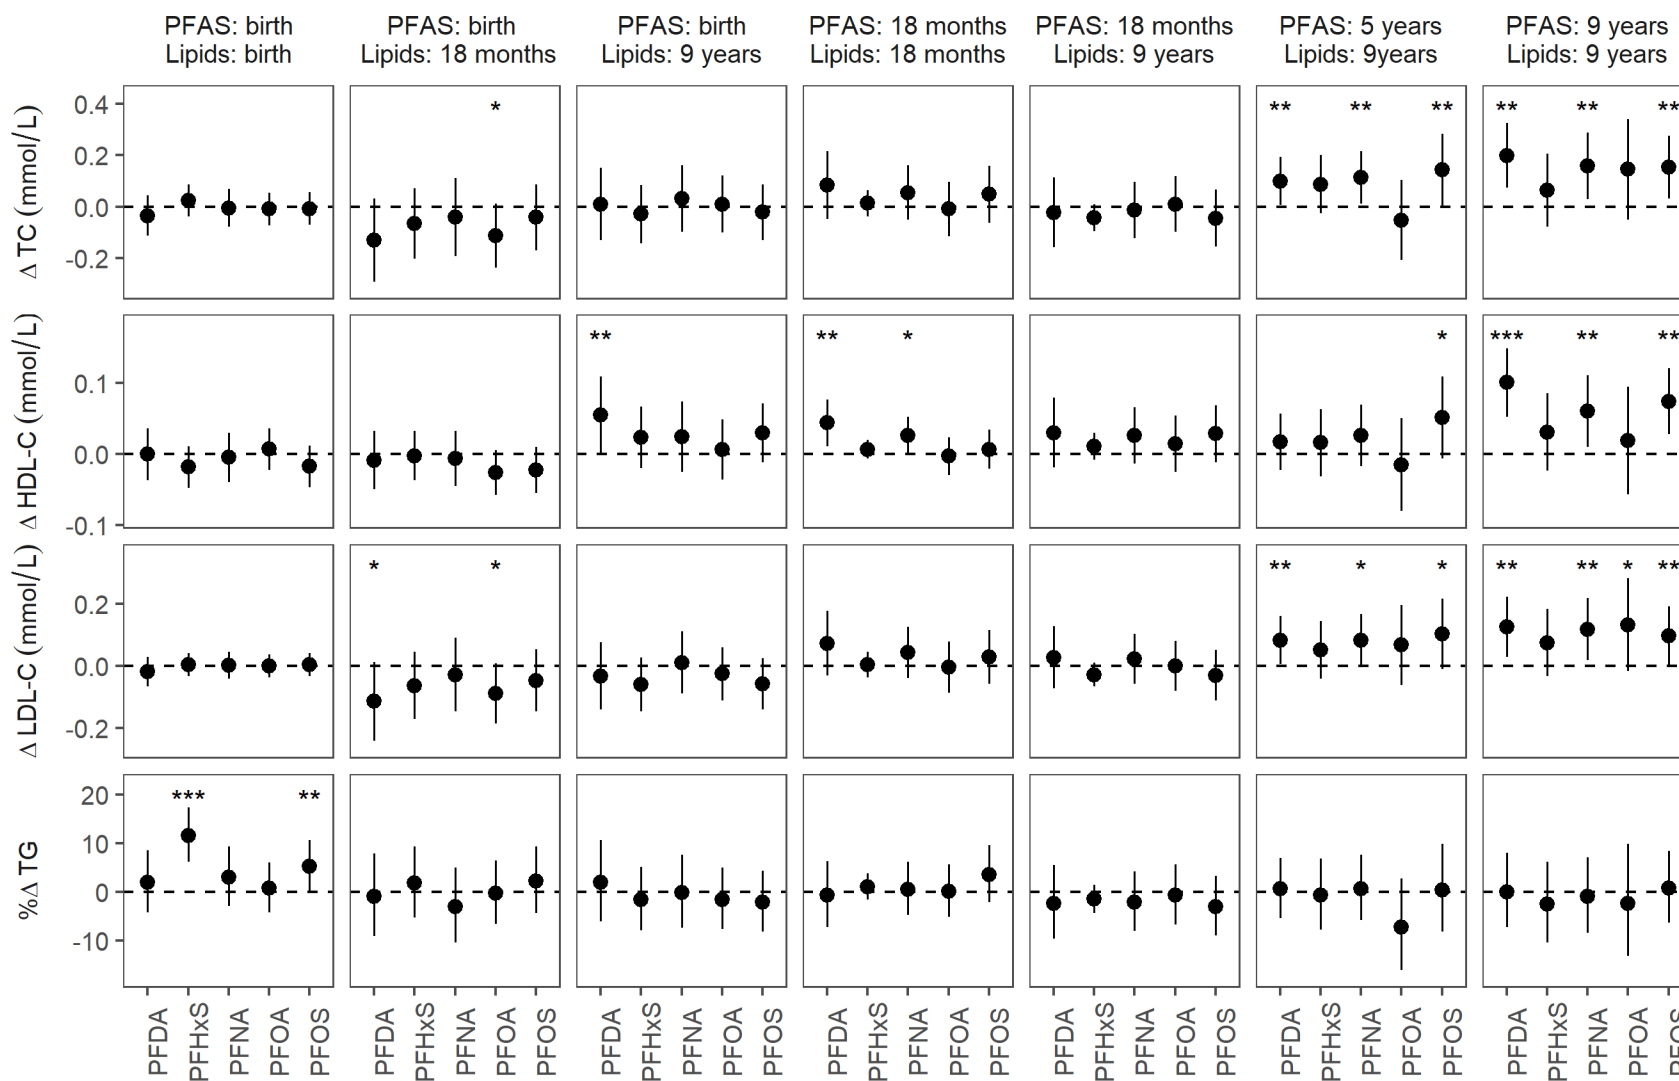

Figure S10: Associations between PFAS exposures and lipids, presented as the estimated change in serum lipid concentrations for a doubling in serum PFAS concentrations. All models were adjusted for child sex and maternal education. Models for PFAS at birth, 18 months and 5 years were further adjusted for smoking, education, parity, and pre-pregnancy BMI.

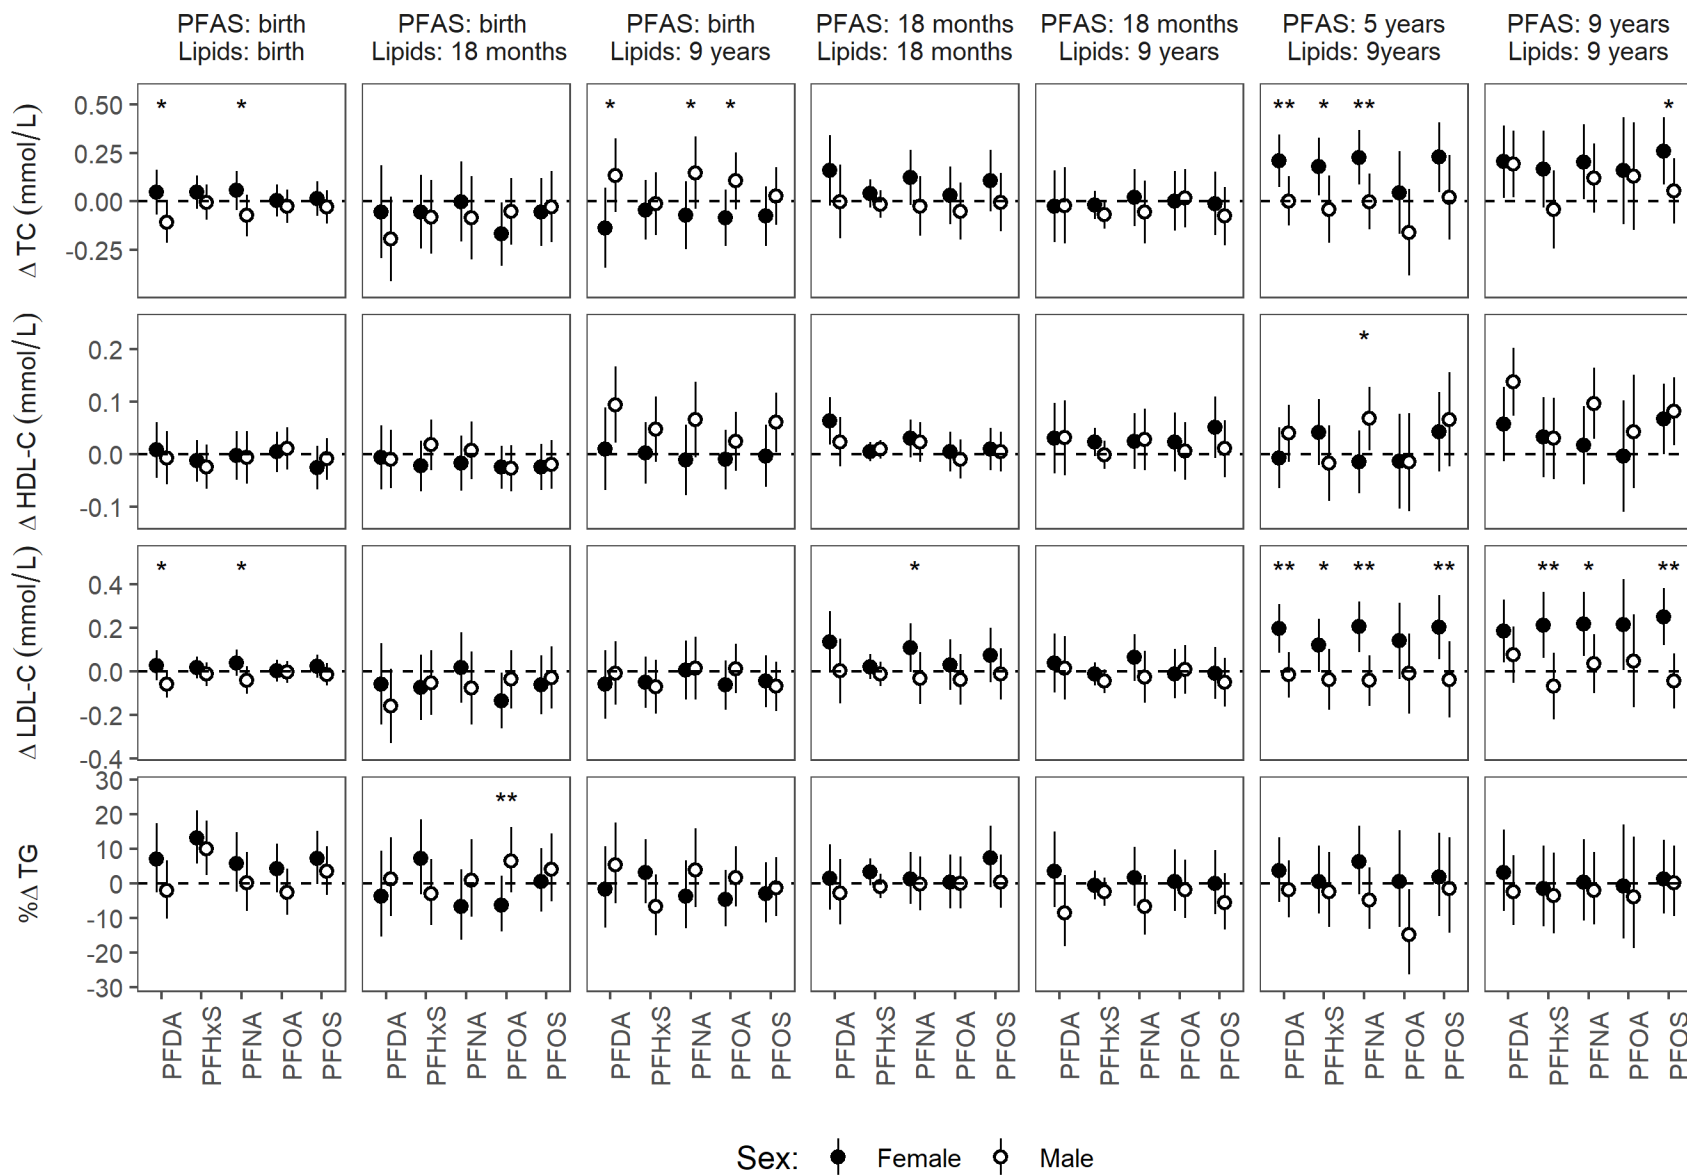

\* p-interaction < 0.01; \*\* p-interaction < 0.05

Figure S11: Associations between PFASs and lipids by sex, calculated from a model that includes an interaction term between PFAS and sex.

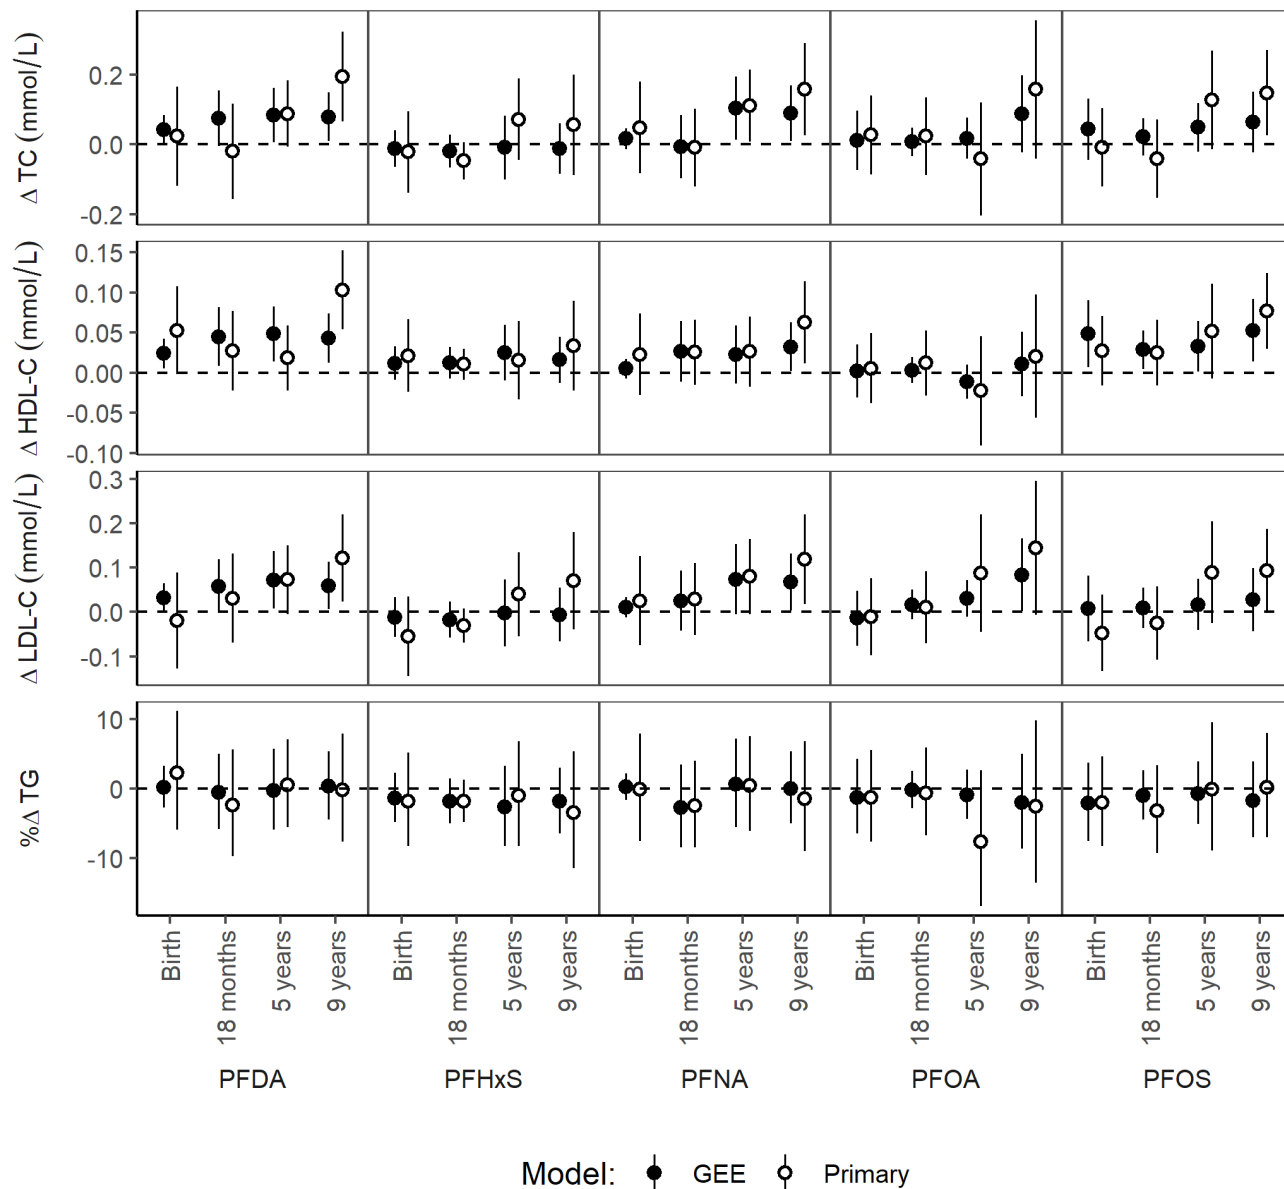

Figure S12: GEE model results for associations between PFAS exposures and lipid outcomes at nine years, compared to primary model results. Results are presented as the estimated difference in serum lipid concentrations for a doubling in serum PFAS concentrations. GEE models were adjusted for child sex, maternal education, smoking, education, parity and pre-pregnancy BMI.



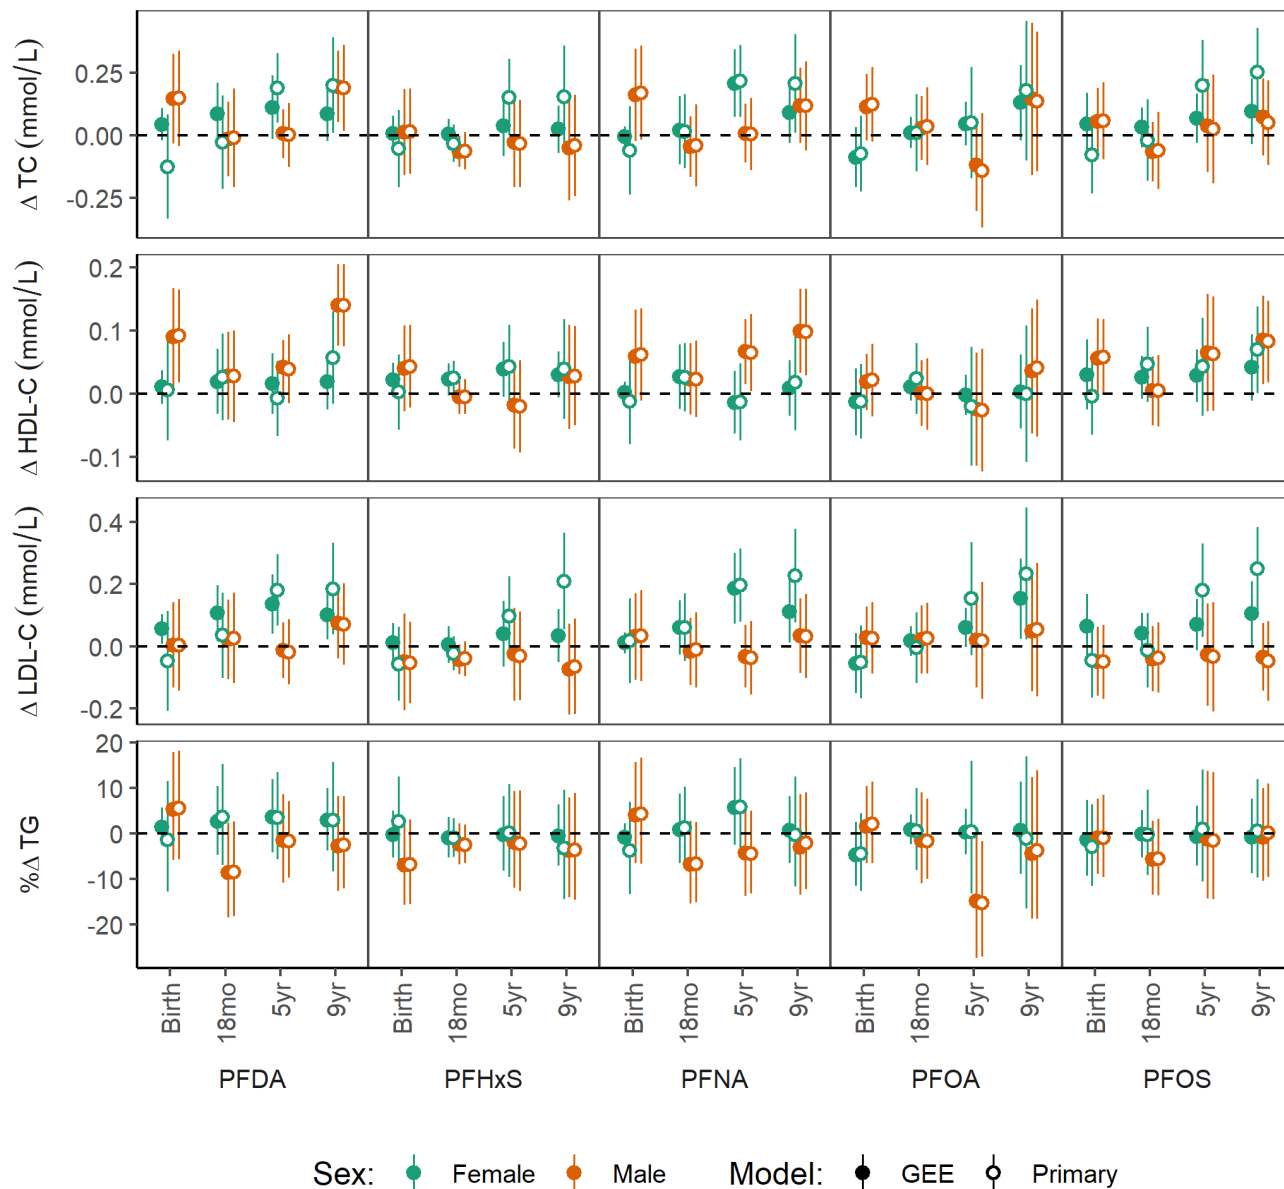

Figure S13: GEE model results for sex-specific associations between PFAS exposures and lipid outcomes at nine years, compared to primary model results. Results are presented as the estimated difference in serum lipid concentrations for a doubling in serum PFAS concentrations. GEE models were adjusted for maternal education, smoking, education, parity and pre-pregnancy BMI.

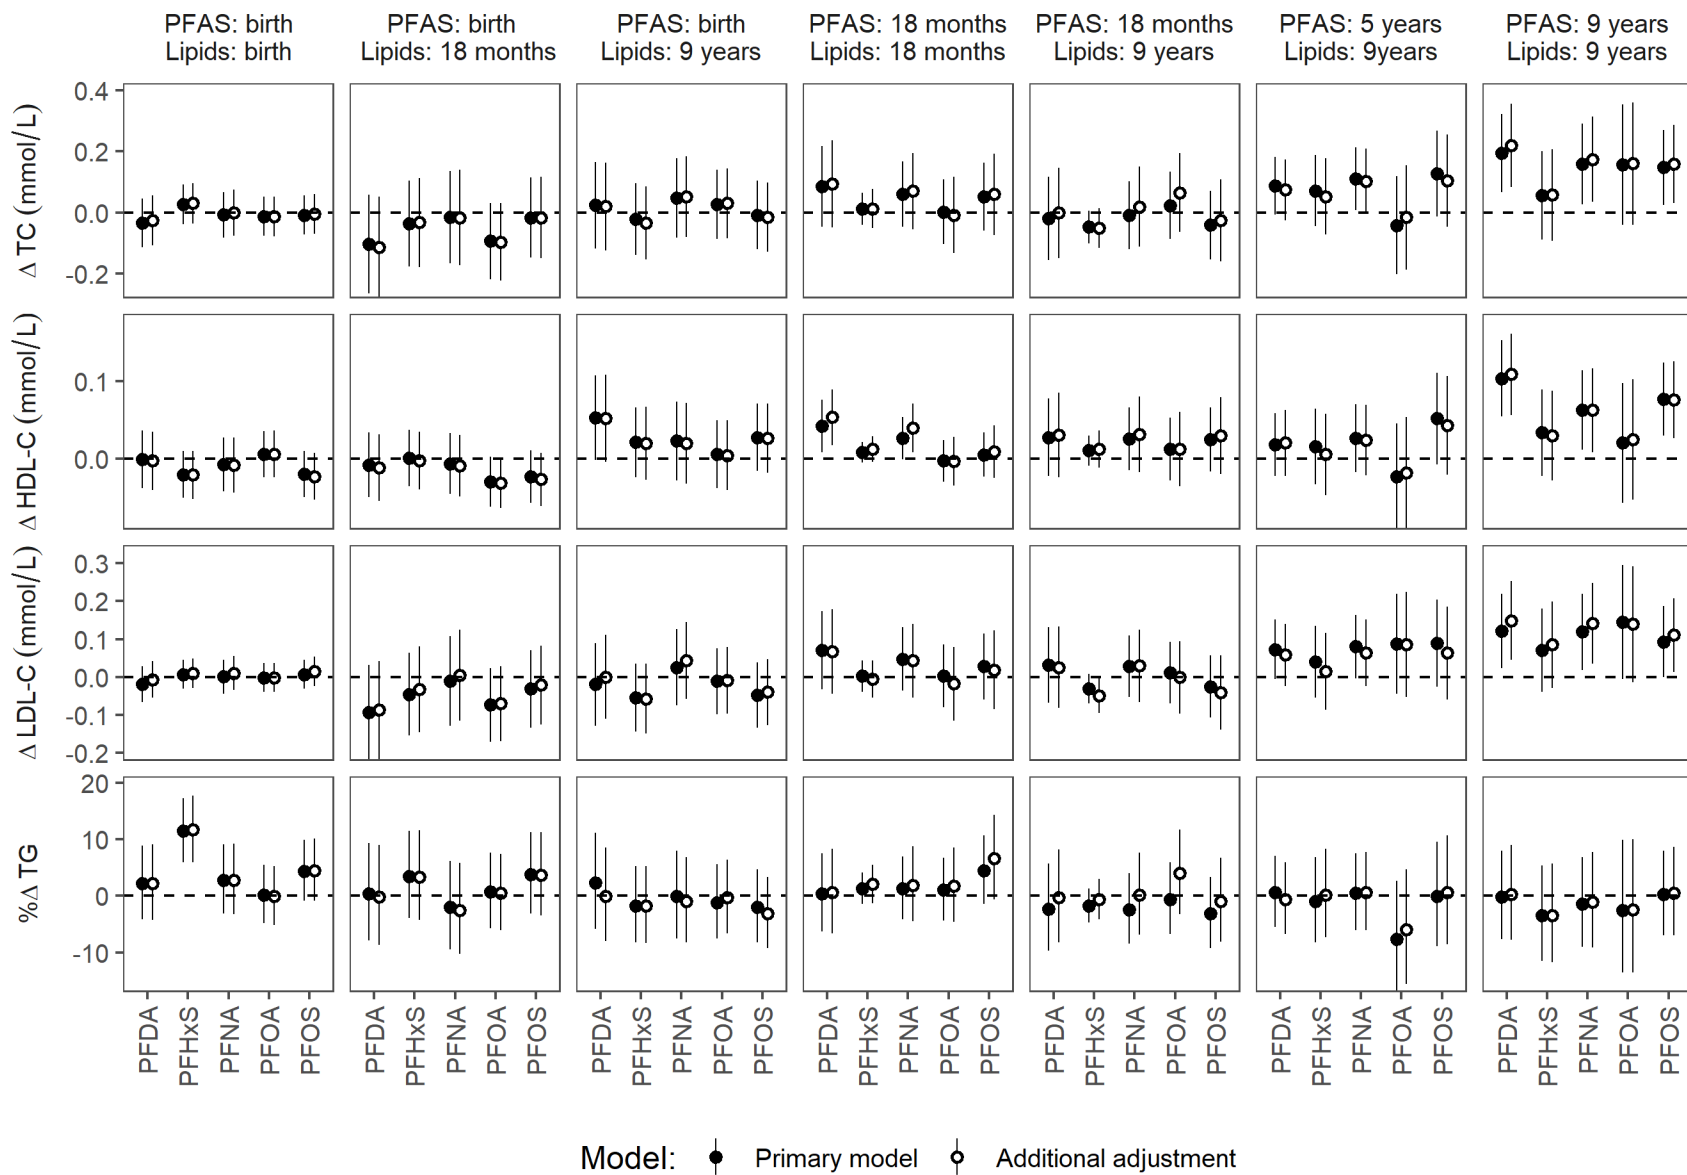

Figure S14: Estimated change in serum lipid concentrations for a doubling in serum PFAS concentrations, with and without additional adjustment for PFAS sources (maternal whale consumption during pregnancy, breastfeed duration and childhood whale consumption)

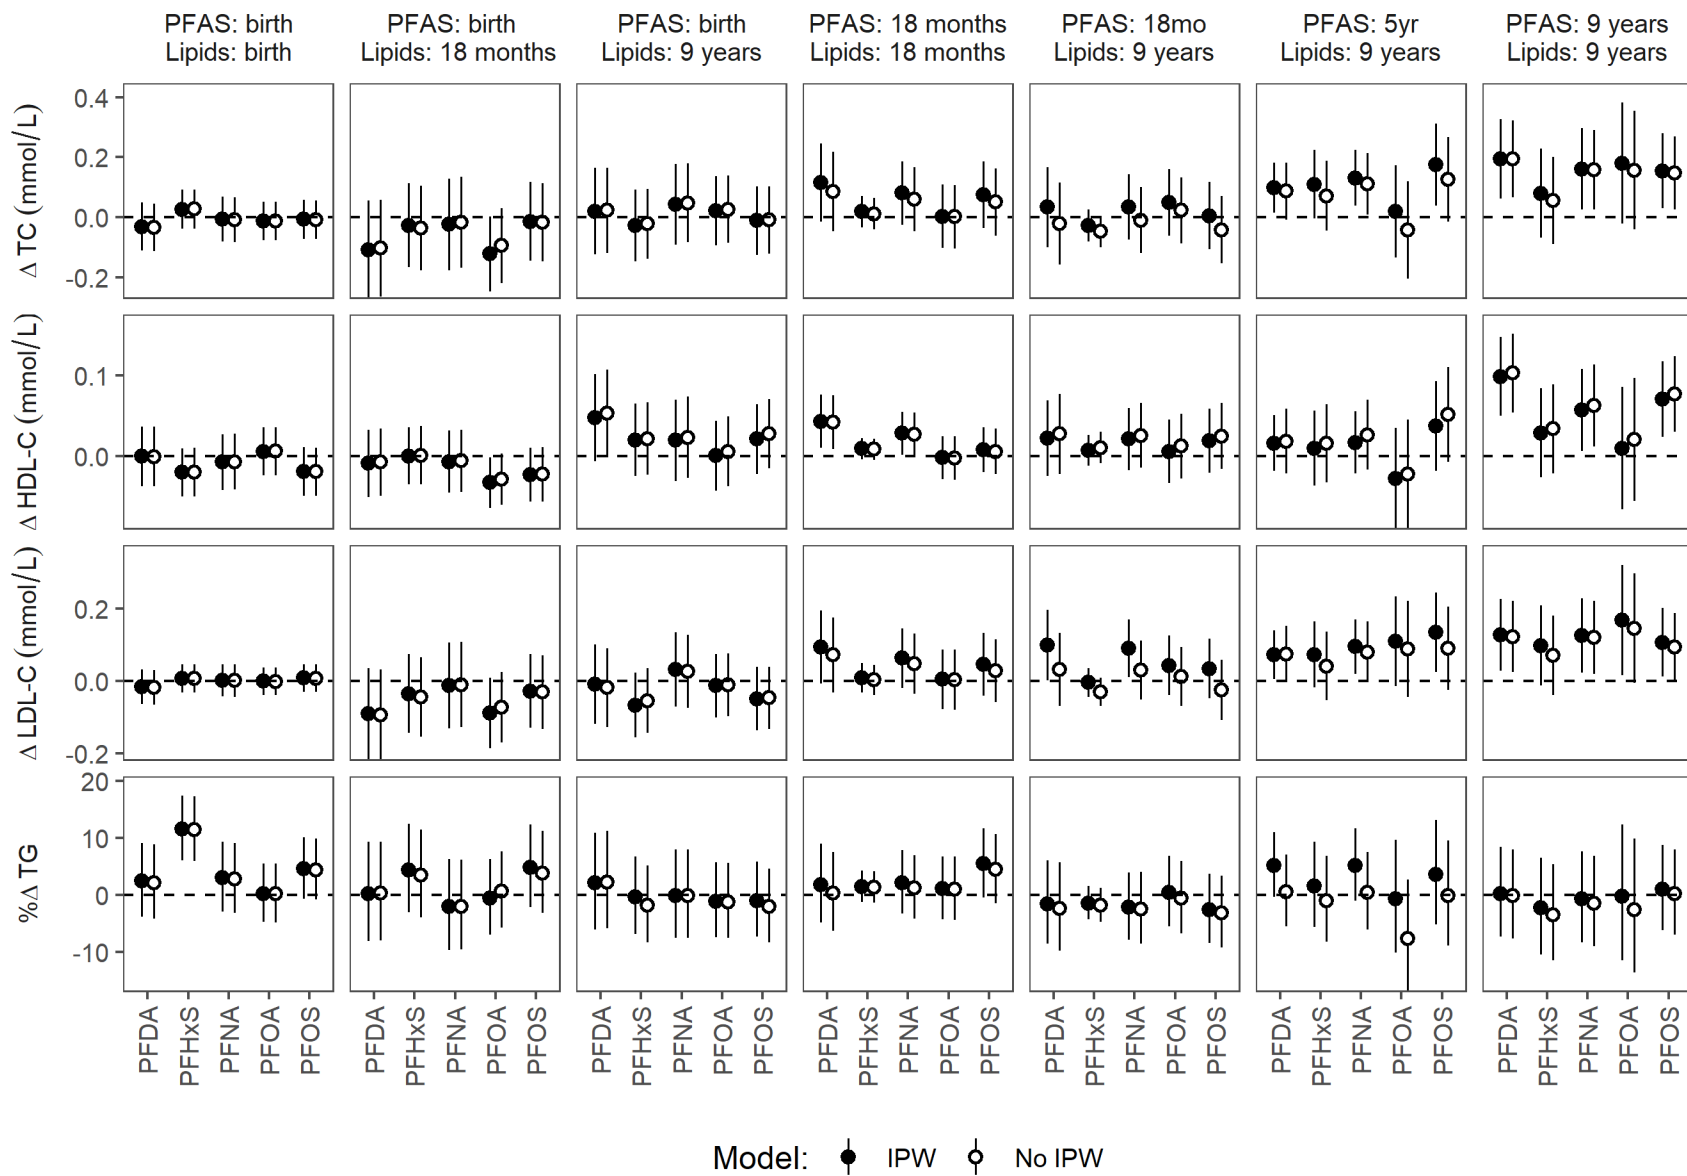

Figure S15: Estimated difference in serum lipid concentrations for a doubling in serum PFAS concentrations, with and without inclusion of stabilized inverse probability weights (IPW) to account for potential loss to follow-up.

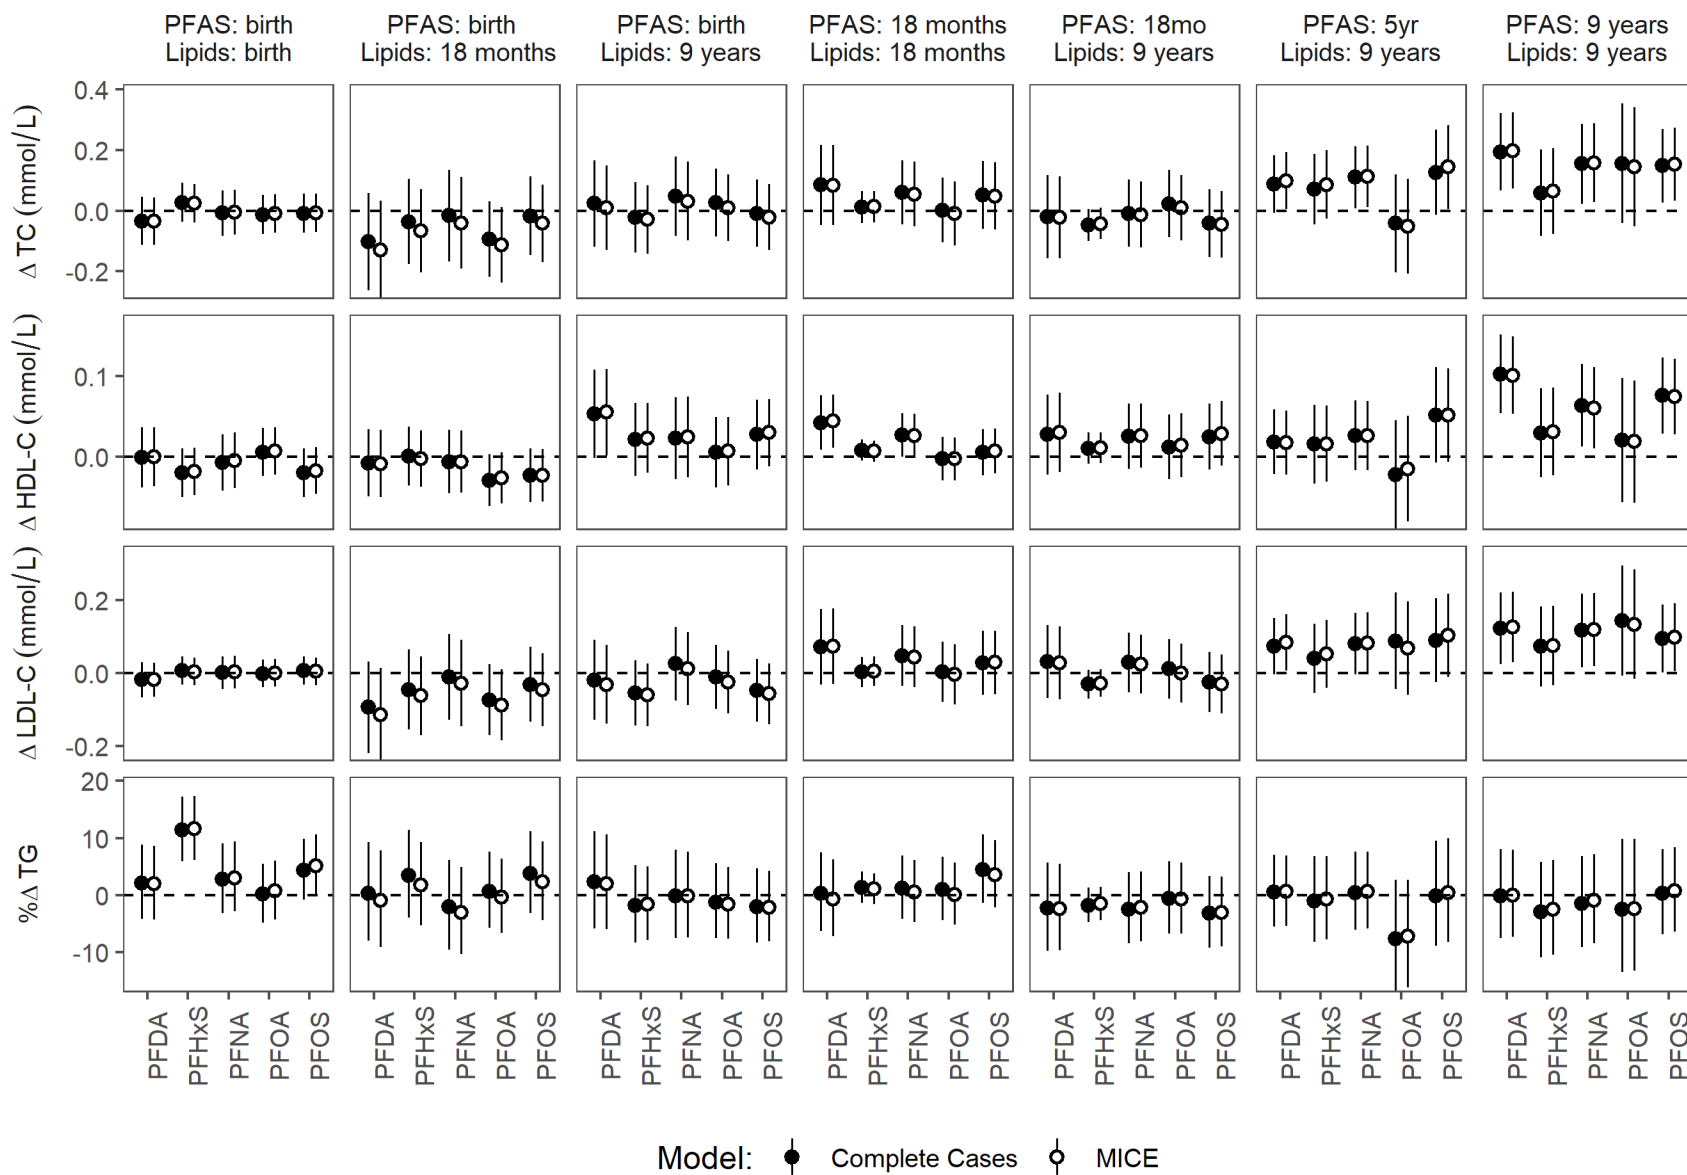

Figure S16: Estimated change in serum lipid concentrations for a doubling in serum PFAS concentrations, estimated using complete cases and our imputed datasets.

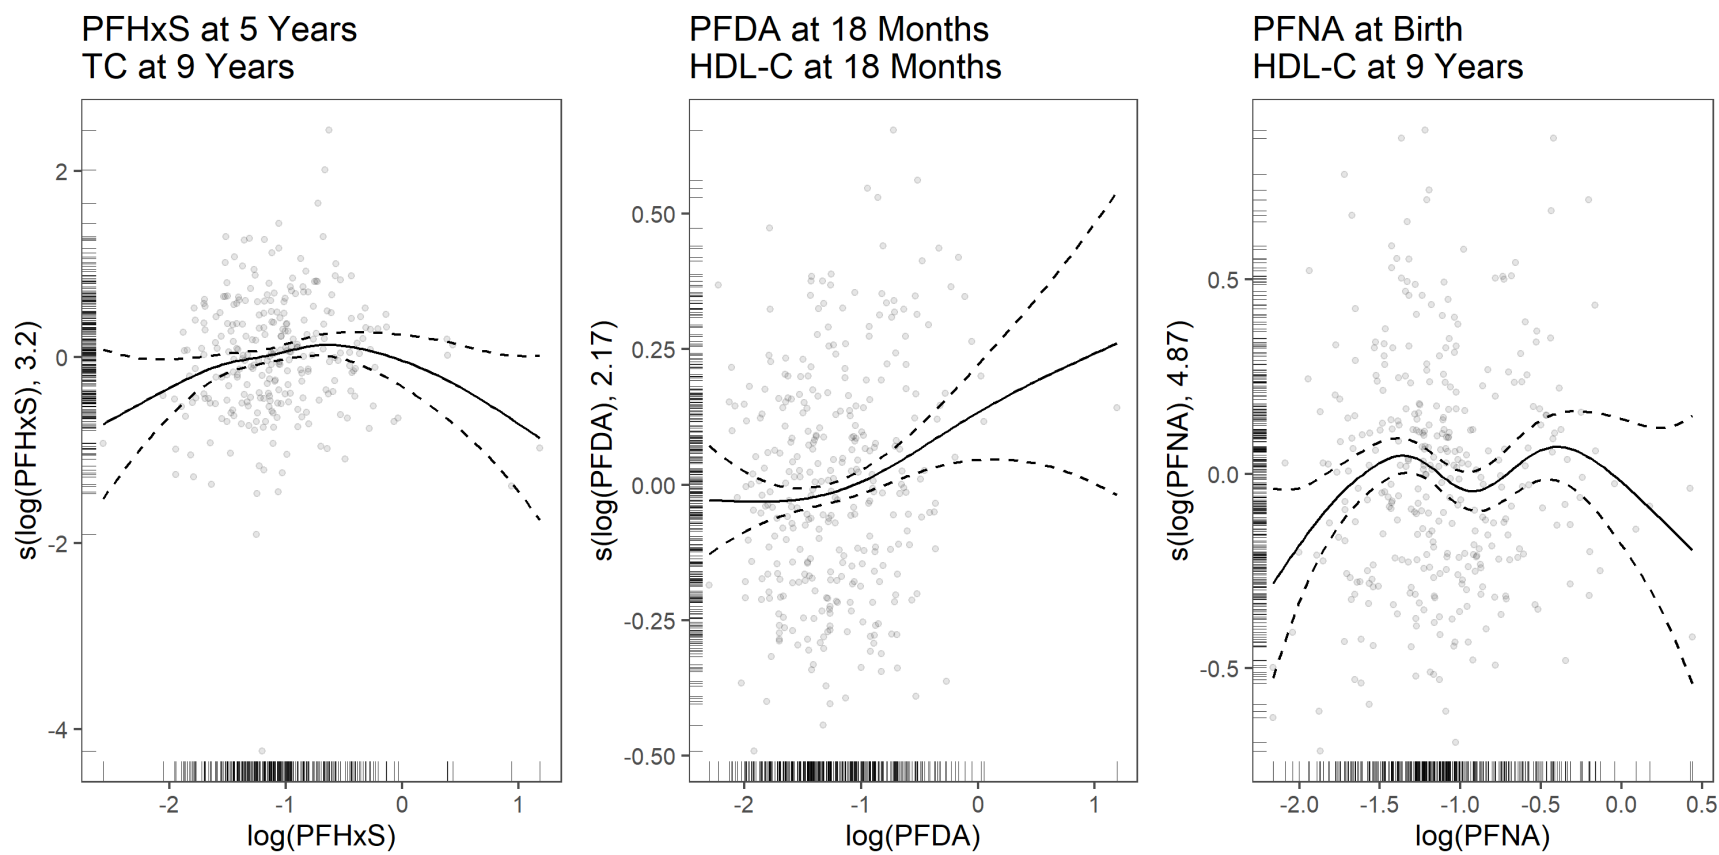

Figure S17: Estimated thin-plate splines for significant nonlinear PFAS terms.
